1 **Chemotherapeutic regulation of the ROS/MondoA-dependent TXNIP/GDF15 axis;**  
2 **and derivation of a new organoid metric as a predictive biomarker.**

3 Jinhai Deng<sup>1\*</sup>, Teng Pan<sup>1\*</sup>, Yourae Hong<sup>2</sup>, Zaoqu Liu<sup>3</sup>, Xingang Zhou<sup>4</sup>, Zhengwen An<sup>1</sup>,  
4 Lifeng Li<sup>5</sup>, Giovanna Alfano<sup>1</sup>, Gang Li<sup>6</sup>, Luigi Dolcetti<sup>1</sup>, Rachel Evans<sup>1</sup>, Jose M Vicencio<sup>1</sup>,  
5 Petra Vlckova<sup>7</sup>, Yue Chen<sup>8</sup>, James Monypenny<sup>1</sup>, Camila Araujo De Carvalho Gomes<sup>9</sup>,  
6 Kenrick Ng<sup>10</sup>, Caitlin McCarthy<sup>1</sup>, Xiaoping Yang<sup>11</sup>, Zedong Hu<sup>2</sup>, Joanna C. Porter<sup>12</sup>,  
7 Christopher J Tape<sup>7</sup>, Mingzhu Yin<sup>13</sup>, Manuel Rodriguez-Justo<sup>14</sup>, Sabine Tejpar<sup>2</sup>, Richard  
8 Beatson<sup>12,15#</sup>, Tony Ng<sup>1,9,16#</sup>

- 9 1. Richard Dumbleby Laboratory of Cancer Research, School of Cancer &  
10 Pharmaceutical Sciences, King's College London, London, UK.  
11 2. Digestive Oncology Unit and Centre for Human Genetics, Universitair Ziekenhuis  
12 (UZ) Leuven, Leuven, Belgium.  
13 3. Department of Interventional Radiology, The First Affiliated Hospital of Zhengzhou  
14 University, Zhengzhou, China.  
15 4. Department of Pathology, Beijing Ditan Hospital, Capital Medical University,  
16 Beijing, China.  
17 5. Internet Medical and System Applications of National Engineering Laboratory,  
18 Zhengzhou, China.  
19 6. Department of General Surgery, Peking University Third Hospital, Beijing, China.  
20 7. Cell Communication Lab, UCL Cancer Institute, 72 Huntley Street, London WC1E  
21 6DD, UK.  
22 8. Centre for Cancer Genomics and Computational Biology, Barts Cancer Institute,  
23 Queen Mary University of London, London EC1M 6BQ, UK.  
24 9. UCL Cancer Institute, University College London, London, United Kingdom.  
25 10. Department of Medical Oncology, University College London Hospitals NHS  
26 Foundation Trust, London, United Kingdom.  
27 11. Centre of Excellence for Mass Spectrometry, Proteomics Facility, The James  
28 Black Centre, King's College London, United Kingdom.  
29 12. Centre for Inflammation and Tissue Repair, UCL Respiratory, Division of Medicine,  
30 University College London (UCL), Rayne 9 Building, London, WC1E 6JF, UK  
31 13. Clinical Research Center (CRC), Medical Pathology Center (MPC), Cancer Early  
32 Detection and Treatment Center (CEDTC), Translational Medicine Research  
33 Center (TMRC), Chongqing University Three Gorges Hospital, Chongqing  
34 University, Wanzhou, Chongqing, China  
35 14. Department of Histopathology, University College London Hospital, London, UK.  
36 15. School of Cancer and Pharmaceutical Sciences, King's College London, Faculty of  
37 Life Sciences and Medicine, Guy's Campus, London SE1 9RT, UK.  
38 16. Cancer Research UK City of London Centre.

39 \* These authors contributed equally to this work.

40 # Corresponding authors.

41

42

43

44

45 **Running title:**

46 **Chemotherapy-induced immunogenicity through the regulation of the TXNIP/GDF15**  
47 **axis.**

48

49 **Statement of Significance**

50 Chemotherapy increases a MondoA-dependent oxidative stress-associated protein,  
51 TXNIP, in transformed epithelial cells. TXNIP negatively regulates a secreted  
52 immunomodulatory protein, GDF15 which induces regulatory T cell (Treg) differentiation,  
53 inhibiting CD4 and CD8 stimulation. The loss of TXNIP/GDF15 axis function is associated  
54 with chemotherapeutic resistance and advanced disease, with pre-treatment  
55 GDF15/TXNIP ratio being shown to be a predictive marker of oxaliplatin response.

56

57 **Correspondence to:**

58 Professor Tony Ng, FMEDSCI, MB ChB, MRCP, FRCPath, PhD. Head of Comprehensive  
59 Cancer Centre, School of Cancer and Pharmaceutical Sciences, King's College London.  
60 Richard Dimpleby Chair of Cancer Research. Chair of Molecular Oncology, Cancer  
61 Institute, University College London. SE1 1UL. E-mail: [tony.ng@kcl.ac.uk](mailto:tony.ng@kcl.ac.uk)  
62 Phone: +44(0)2078486131 (KCL) and +44(0)2076796472 (UCL)

63 Dr. Richard Beatson, Centre for Inflammation and Tissue Repair, UCL Respiratory,  
64 Division of Medicine, University College London (UCL), Rayne 9 Building, London, WC1E  
65 6JF, UK. School of Cancer and Pharmaceutical Sciences, King's College London, Faculty  
66 of Life Sciences and Medicine, Guy's Campus, London SE1 9RT, UK. E-mail:  
67 [r.beatson@ucl.ac.uk](mailto:r.beatson@ucl.ac.uk) Phone: +44(0) 2035495979

68

69 **Conflicts of interest:** All authors declare no conflicts of interest.



71 **Abstract**

72 Chemotherapy, the standard of care treatment for cancer patients with advanced disease,  
73 has been increasingly recognised to activate host immune responses to produce durable  
74 outcomes. Here, in colorectal adenocarcinoma (CRC) we identify chemotherapy-induced  
75 Thioredoxin Interacting Protein (*TXNIP*), a MondoA-dependent tumor suppressor gene, as  
76 a negative regulator of Growth/Differentiation Factor 15 (GDF15). GDF15 is a negative  
77 prognostic factor in CRC and promotes the differentiation of regulatory T cells (Tregs),  
78 through CD48 ligation. Intriguingly, multiple models including patient-derived tumor  
79 organoids demonstrate that loss of TXNIP/GDF15 axis functionality is associated with  
80 advanced disease or chemotherapeutic resistance, with transcriptomic or proteomic  
81 GDF15/TXNIP ratios showing potential as a prognostic biomarker. These findings  
82 illustrate a potentially common pathway where chemotherapy-induced epithelial stress  
83 drives local immune remodelling for patient benefit, with disruption of this pathway seen in  
84 refractory or advanced cases.

85 Key words: Colorectal cancer, Chemotherapy, TXNIP, GDF15, MondoA, Treg, Resistance.

86

## 87 Introduction

88 Colorectal adenocarcinoma (CRC) has the fourth highest mortality amongst cancers, and  
89 is characterized by its aggression and heterogeneity<sup>1,2</sup>. Randomized controlled clinical  
90 trials have established that chemotherapy results in improved clinical outcomes<sup>3</sup>. 5-FU  
91 (fluorouracil), oxaliplatin and irinotecan are the foundation of first-line (FOLFOX) and  
92 second-line (FOLFIRI)<sup>4</sup> treatment respectively. Despite mechanistic differences, all  
93 chemotherapy regimens induce apoptosis of replicating cells, leading to a reduction in  
94 tumor volume. Chemotherapeutic regimens have historically been regarded as  
95 immunologically silent or toxic, however, this view is being increasingly challenged with  
96 reports showing that these treatments can modulate immune cells within the tumor  
97 microenvironment (TME)<sup>5,6</sup>.

98 Harnessing the immune system is crucial in achieving long-term durability of response<sup>7</sup>,  
99 and chemotherapy reportedly activates anti-tumor immune responses through several  
100 mechanisms<sup>8-12</sup>. For example, chemotherapy-induced immunogenic cell death (ICD)  
101 leads to cells exposing or releasing damage-associated molecular patterns (DAMPs),  
102 such as HSP70, calreticulin, ATP, high-mobility group box 1 (HMGB1), type I IFN, cancer  
103 cell-derived nucleic acids and annexin A1<sup>9,10</sup>. These mediators drive anti-tumor immune  
104 responses via innate immune cells (dendritic cells [DC], macrophages, NK cells,  $\gamma\delta$ T cells)  
105 and adaptive immune cells (T and B cells). Additionally, chemotherapy has been shown to  
106 upregulate HLA expression and alter the peptides presented on MHC class I molecules,  
107 enabling an antitumor T cell response through the expression of, and reaction to, neo-  
108 antigens<sup>8</sup>. Other chemotherapy-induced anti-tumor immunological mechanisms include  
109 the down-regulation of immune checkpoint molecules (e.g. PD-L1)<sup>11,12</sup>, however,  
110 knowledge of these mechanisms has not yet been translated into a targeted chemo-  
111 immunotherapeutic treatment regimes. These anti-tumor immunological benefits of  
112 chemotherapy are, of course, balanced by pro-tumor impacts; chemotherapy-induced

113 apoptosis itself, whether epithelial or immune, has been shown to be associated with  
114 immunosuppression in multiple cancers<sup>13,14</sup>.

115 Thioredoxin-interacting protein (TXNIP), an alpha-arrestin protein, is commonly  
116 considered a master regulator of cellular oxidation, regulating the expression of  
117 Thioredoxin (Trx) via direct binding<sup>15,16</sup>. It has been seen to be silenced by genetic or  
118 epigenetic events in a wide range of human tumors, whilst TXNIP-deficient mice have a  
119 higher incidence of spontaneous hepatocellular carcinoma<sup>17-20</sup>. Consequently, TXNIP is  
120 considered a tumor suppressor gene (TSG). In cell biology, TXNIP has been reported to  
121 regulate the cell cycle, oxidative stress responses, angiogenesis, glycolysis and the  
122 NLRP3 inflammasome<sup>21-29</sup>. Previous studies have shown chemotherapy drives an  
123 increase of TXNIP expression leading to cell cycle arrest and death in epithelial cells<sup>30,31</sup>,  
124 however, there are currently no studies that assess the effect of chemotherapy-induced  
125 TXNIP expression on the cells that survive chemotherapy, and an understanding of their  
126 impact on the TME.

127 Growth/Differentiation Factor 15 (GDF15), is a distant member of the TGF- $\beta$  superfamily<sup>32</sup>.  
128 At rest, GDF15 is produced at low levels by most epithelial tissues, however in cancers it  
129 is frequently over-expressed, particularly in hepatocellular carcinoma, prostate cancer and  
130 colorectal cancer<sup>33,34</sup>. Initially, GDF15 was identified as anti-tumorigenic protein with pro-  
131 apoptotic capability<sup>35</sup>. However, its tumor-promoting effects are now well-documented to  
132 the extent that it is being promoted as a serological biomarker, with increased  
133 concentrations being associated with progression, recurrence and death<sup>36,37</sup>, whilst over-  
134 expressing or knock-out murine models have demonstrated its promotional role in  
135 tumorigenesis<sup>38</sup>. Immunologically, GDF15 is considered an anti-inflammatory factor,  
136 supported by the evidence that ubiquitous overexpression decreased systemic  
137 inflammatory responses<sup>39</sup> alongside its negative functional impact on macrophages,  
138 dendritic cells and NK cells, coupled with its ability to induce Tregs<sup>40-42</sup>. As a soluble  
139 protein, GDF15 exerts its effects by binding to its cognate receptors. To date, there are

140 three receptors reported: Transforming Growth Factor-beta receptor II (TGF- $\beta$ RII), GDNF-  
141 family receptor a-like (GFRAL) and CD48 receptor (SLAMF2).

142 In this work, using a variety of *in vitro* models, including patient-derived tumor organoids  
143 (PDTOs) we demonstrate that oxaliplatin-based chemotherapy reshapes the TME via an  
144 increase in ROS-mediated MondoA-dependent TXNIP expression, resulting in decreased  
145 expression and secretion of GDF15, leading to a decrease in regulatory T cell (Treg)  
146 differentiation. To support the concept of a TXNIP/GDF15/Treg regulatory axis *in situ*, an  
147 anti-correlation of TXNIP and GDF15 was observed in matched fresh patient tissue (pre  
148 and post chemotherapy), fixed tissue, whole tumor transcripts, and single cell seq data,  
149 whilst GDF15 was further seen to correlate with Foxp3 in fixed samples and a  
150 transcriptomic dataset. With regards clinical impact, both low TXNIP and high GDF15  
151 were shown to be poor prognostic indicators when assessing protein or transcript  
152 expression, allowing us to postulate that the inversion of this phenotype through  
153 chemotherapeutic treatment may be associated with positive outcome. Further to this, the  
154 axis was seen to be unresponsive in CRC cell lines derived from secondary sites, in a  
155 similar manner to chemotherapy-resistant CRC cell lines, with aggressive primary tumours  
156 also showing a similar trend. These data suggest that the loss of a responsive axis allows  
157 for tumor survival, with this concept being supported by transcriptomic analysis of primary  
158 and metastatic disease and responsive and non-responsive cases. Beyond the biology,  
159 this study illustrates the potential of the pre-treatment GDF15/TXNIP ratio as a tool to  
160 predict chemotherapeutic response in patients allowing for appropriate immunotherapy  
161 (GDF15 antagonists in this case) to be administered to non-responders at an early  
162 timepoint in a precise and informed manner.

## 163 **Results**

164 **TXNIP is upregulated after chemotherapy and associated with favourable prognosis**

165 TXNIP is relatively well-studied in cancer and has been reported to have tumor-  
166 suppressive effects as discussed<sup>43</sup>. In CRC, TXNIP expression has been observed to be  
167 decreased in tumor cases compared to normal tissues<sup>44</sup>. In support of this, analysis of the  
168 TCGA COAD (CRC) database showed decreased *TXNIP* mRNA in tumor samples  
169 compared to normal controls (Figure S1A). To validate this, we collected 42 CRC patient  
170 samples and observed that tumors presented lower expression of TXNIP as compared to  
171 adjacent normal tissue (ANT) (Figure 1A, B). We then used single cell transcriptomics to  
172 confirm the same observation in epithelial cells in CRC (Figure 1C).

173 TXNIP has previously been shown to be increased during chemotherapy-induced cell  
174 death<sup>30,31</sup>. As TXNIP is considered vital in the regulation of intracellular reactive oxygen  
175 species (ROS), which are generated by chemotherapeutic treatment, we questioned  
176 whether TXNIP could additionally act as a survival factor. To test this, we took biopsies  
177 from CRC patients before and after oxaliplatin-based chemotherapy and measured TXNIP,  
178 finding an increase in expression after chemotherapy in 8/11 patients (Figure 1D-F).  
179 Somewhat presciently, in light of subsequent findings, 3/11 patients (patients 2, 3 and 10),  
180 with advanced disease, showed no increase after treatment (Figure 1D-F). To assess for  
181 any association between TXNIP expression and disease progression, and to test whether  
182 the chemotherapy inspired increase we had observed would be of benefit to the patient,  
183 we used two historic tissue cohorts and two publicly available transcriptomic datasets.  
184 High levels of both the protein and the transcript were seen to be associated with  
185 favourable prognosis (Figure 1G,H and S1B,C). Moreover, in historic patient cohorts,  
186 TXNIP expression was observed to be significantly negatively correlated with clinical  
187 stage and lymph node metastasis, with no correlation with respect to age, sex, or tumor  
188 size (Table 1 and Table 2)



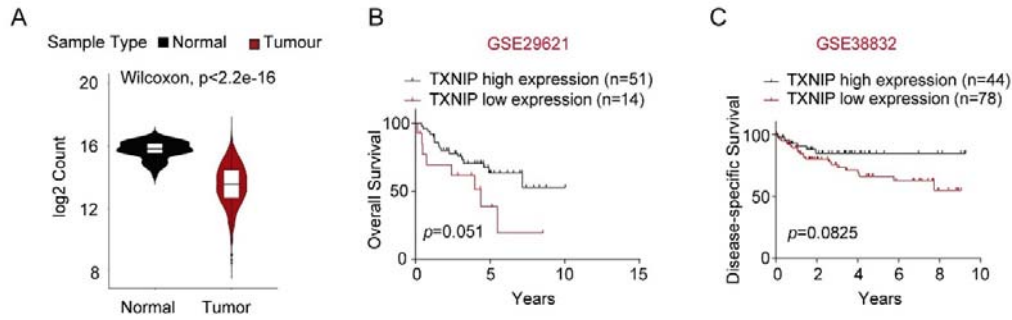

189

190 **Figure S1. TXNIP expression is lower in colorectal cancer samples compared to normal**  
191 **tissues.** (A) Analysis of The Cancer Genomic Atlas (TCGA) Colon Adenocarcinoma (COAD)  
192 database. Comparative analysis of TXNIP transcript expression between adjacent normal tissue  
193 and cancer tissues. (B-C) Kaplan-Meier analysis of overall survival (B) and distant metastasis-free  
194 survival (C) in CRC patients with different TXNIP mRNA expression levels. Wilcoxon rank-sum test  
195 p value indicated.

196

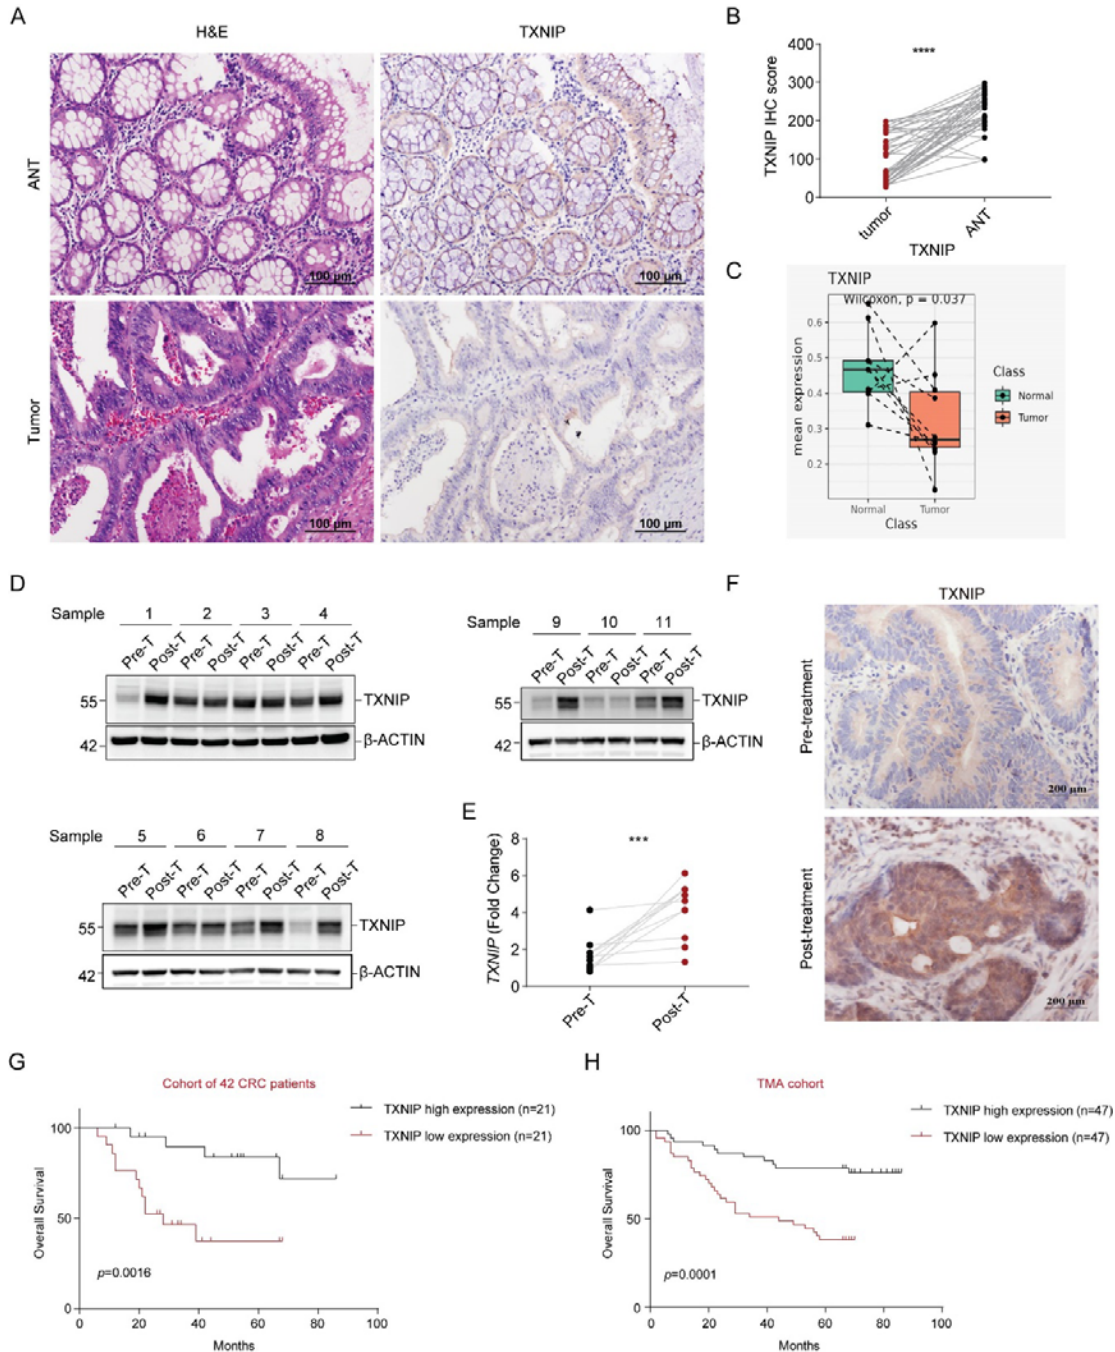

197

198 **Figure 1. Lower TXNIP expression is observed in CRC tumor samples, however it is**  
 199 **increased post-chemotherapeutic treatment. Low levels of TXNIP are associated with poor**  
 200 **prognosis.** (A) Example of H&E and TXNIP staining in primary CRC tumors and matched adjacent  
 201 normal tissue (ANT) samples. Magnification  $\times 200$ . (B) Pooled TXNIP scoring from primary CRC  
 202 tumors and matched ANT samples ( $n=42$ ). (C) TXNIP transcript expression in single epithelial cells  
 203 derived from matched primary CRC tumors and adjacent normal colon ( $n=10$  pairs). (D) TXNIP

204 expression in 11 paired treatment-naïve (Pre-T) tumor samples and oxaliplatin-based neo-adjuvant  
 205 chemotherapy treated tumor samples (Post-T). (E) TXNIP mRNA levels in samples from D. (F)  
 206 Example of TXNIP staining in matched Pre-T and Post-T samples. Magnification ×400. (G-H)  
 207 Kaplan–Meier analysis of overall survival in CRC patients with different TXNIP staining scores from  
 208 a cohort of 42 CRC patients (G) and CRC tumor tissue microarray (n=94) (H). Data in (G) and (H)  
 209 were analyzed using two-tailed log-rank test; data in (B) and (E) were analyzed using two-tailed,  
 210 two-sample unpaired Student's t test. Data in (C) were analysed using Wilcoxon paired test. Values  
 211 were expressed as mean ± SEM. \*\*\*p < 0.001, \*\*\*\*p < 0.0001, vs. Control

212 Table 1

213 Association between TXNIP expression and clinicopathological features of patients with  
 214 colorectal cancer in the cohort of 42 CRC patients

|                | Total<br>(n = 42) | TXNIP expression |                  | P value |
|----------------|-------------------|------------------|------------------|---------|
|                |                   | Low<br>(n = 21)  | High<br>(n = 21) |         |
| Gender         |                   |                  |                  | 0.5366  |
| Male           | 22                | 12               | 10               |         |
| Female         | 20                | 9                | 11               |         |
| Age(year)      |                   |                  |                  | >0.9999 |
| <65            | 32                | 16               | 16               |         |
| ≥65            | 10                | 5                | 5                |         |
| T stage        |                   |                  |                  | >0.9999 |
| T1-T2          | 9                 | 4                | 5                |         |
| T3-T4          | 33                | 17               | 16               |         |
| N stage        |                   |                  |                  | 0.0219* |
| N0             | 14                | 3                | 11               |         |
| N1+N2+N3       | 28                | 18               | 10               |         |
| M stage        |                   |                  |                  | 0.0278* |
| M0             | 25                | 9                | 16               |         |
| M1             | 17                | 12               | 5                |         |
| Clinical stage |                   |                  |                  | 0.0219* |
| I/II           | 14                | 3                | 11               |         |

III/IV                      28                      18                      10

---

\*  $P < 0.05$

215 Table 2

216 Association between TXNIP expression and clinicopathological features of patients with  
217 colorectal cancer in the TMA cohort

|                | Total<br>(n = 96) | TXNIP expression |                  | P value  |
|----------------|-------------------|------------------|------------------|----------|
|                |                   | Low<br>(n = 48)  | High<br>(n = 48) |          |
| Gender         |                   |                  |                  | >0.9999  |
| Male           | 52                | 26               | 26               |          |
| Female         | 44                | 22               | 22               |          |
| Age(year)      |                   |                  |                  | 0.2191   |
| <65            | 44                | 25               | 19               |          |
| ≥65            | 52                | 23               | 29               |          |
| T stage        |                   |                  |                  | 0.2419   |
| T1-T2          | 3                 | 0                | 3                |          |
| T3-T4          | 90                | 46               | 44               |          |
| N stage        |                   |                  |                  | <0.0001* |
| N0             | 55                | 16               | 39               |          |
| N1+N2+N3       | 40                | 31               | 9                |          |
| M stage        |                   |                  |                  | 0.2421   |
| M0             | 93                | 45               | 48               |          |
| M1             | 3                 | 3                | 0                |          |
| Clinical stage |                   |                  |                  | <0.0001* |
| I/II           | 54                | 16               | 38               |          |
| III/IV         | 40                | 31               | 9                |          |

---

\*  $P < 0.05$

218

219 **MondoA regulates chemotherapy-induced TXNIP expression**

220 To assess for the relative expression change of TXNIP after chemotherapy, compared to  
221 other transcripts, we used primary colorectal cancer cell lines (DLD1 and HCT15) and  
222 treated them with a clinically relevant concentration ( $10\mu\text{M}$ )<sup>45</sup> of oxaliplatin or vehicle. The  
223 dead cells were discarded and the live cells were sent for RNA sequencing analysis. The  
224 results showed that TXNIP was upregulated as one of the top differentials in both cell  
225 lines (Figure 2A, B, Suppl Table 1); validated by RT-PCR and Western blot (Figure 2C-F,  
226 S2A-D). Further to this, oxaliplatin upregulated *TXNIP* in a time-dependent (Figure 2C-D,  
227 S2A-B) and dose-dependent fashion (Figure 2E-F, S2C-D). 3D (three-dimensional) cell  
228 models are reported to be more accurate in mimicking *in vivo* features such as drug  
229 responses<sup>46</sup>, therefore we assessed whether this response was observed in cell line-  
230 derived spheroids and two patient-derived organoids. In both models we observed the  
231 upregulation of TXNIP mRNA (Suppl Fig 2E-H) and protein (Suppl Fig 2I-L) after  
232 oxaliplatin treatment.

233 The thioredoxin (Trx) antioxidant system includes NADPH, thioredoxin reductase (TrxR),  
234 and Trx. TXNIP is essential for redox homeostasis due to its ability to bind to Trx and  
235 inhibit Trx function and expression<sup>47</sup>. As discussed, oxaliplatin treatment induces ROS<sup>48</sup>,  
236 whilst oxidative stress is associated with TXNIP expression<sup>49</sup>. As such, we considered  
237 whether the increase in TXNIP expression after oxaliplatin treatment was mediated by  
238 ROS. In line with previous studies<sup>50</sup>, oxaliplatin was observed to increase ROS production  
239 in DLD1 and HCT15 cells (Figure S3A-B). Next, to understand whether it was this  
240 increase in oxaliplatin-dependent ROS that drove the increase in TXNIP, we administrated  
241 N-acetyl-L-cysteine (NAC, reactive oxygen species inhibitor) with oxaliplatin and observed  
242 no increase in TXNIP expression (Figure 2G-H, S3C).

243 We next investigated which transcription factor may mediate ROS-induced TXNIP  
244 expression. The RNA-seq data revealed 23 differentially expressed genes (DEGs) shared  
245 between both cell lines, including TXNIP (Figure S3D-E, Suppl Table 2). One of these  
246 DEGs, was arrestin domain-containing protein 4 (*ARRDC4*). *ARRDC4* was increased after

247 oxaliplatin treatment (Figure S3D-E; validated by RTPCR [Figure S3F-G]), and, like  
248 TXNIP, this increase shown to be dependent on ROS (Figure S3F-G). TXNIP and  
249 ARRDC4 are paralogs showing 63% similarity and are both regulated by the transcription  
250 factor MondoA<sup>51,52</sup>, indeed TXNIP and ARRDC4 have been reported to be highly MondoA-  
251 dependent<sup>53</sup>. We therefore assessed MondoA expression before and after oxaliplatin  
252 treatment, finding no change (Figure S3H). With MondoA having previously being shown  
253 to shuttle into the nucleus to carry out its functions<sup>53</sup>, we assessed for MondoA in different  
254 cellular fractions. The result showed MondoA was indeed translocated into the nucleus  
255 after oxaliplatin treatment (Figure S3I).

256 To assess the role of MondoA in oxaliplatin-induced TXNIP upregulation, we established  
257 MondoA-KO cells and MondoA-KD cells using CRISPR-Cas9 and siRNA, respectively.  
258 Using these models we saw that the removal or decrease of MondoA resulted in the loss  
259 of increased expression of both TXNIP and ARRDC4 after oxaliplatin treatment (Figure 2I-  
260 L). To further strengthen our conclusions, we used ChIP-PCR to verify the dependence of  
261 these processes on MondoA. Relative to the control, the amount of MondoA on the TXNIP  
262 promoter was significantly increased after oxaliplatin treatment, which was compromised  
263 after combined treatment with NAC (Figure 2M). Taken together, these results  
264 demonstrated that ROS production was responsible for oxaliplatin-induced TXNIP  
265 overexpression by activating MondoA transcriptional activity.



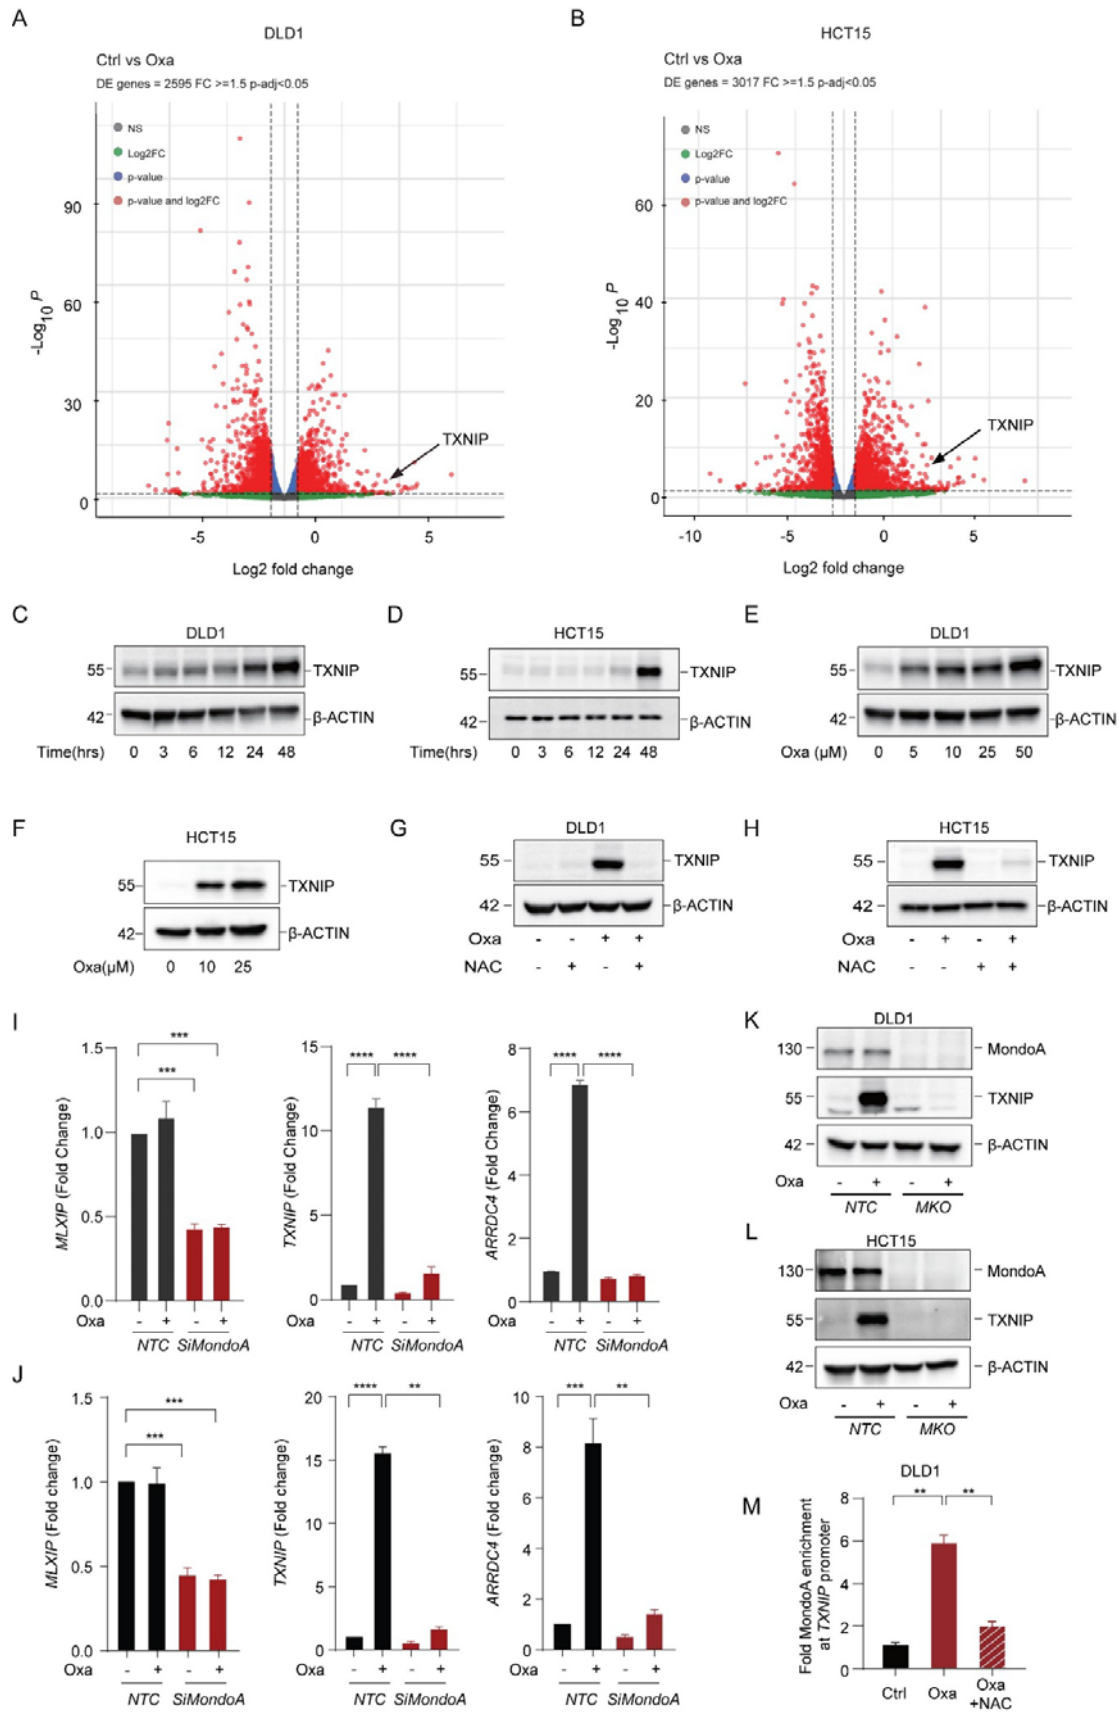



268 **Figure 2.ROS mediates chemotherapy-induced TXNIP expression by modulating MondoA.**  
269 (A-B) DLD1 cells (A) or HCT15 cells (B) were treated with 10  $\mu$ M oxaliplatin for 48h and surviving  
270 cells were analysed by RNA sequencing. A volcano plot (log<sub>2</sub> FC versus negative log of P value)  
271 was used to visualize statistically significant gene expression changes (fold  $\geq$ 1.5 and adjusted P  
272 value <0.05). *TXNIP* is labelled. The number of DE genes is indicated in the upper left. 3 biological  
273 replicates per group. (C-D) Western blotting analysis of TXNIP expression in DLD1 cells (C) or  
274 HCT15 cells (D) treated with oxaliplatin at different time points.  $\beta$ -ACTIN was used as an internal  
275 reference. (E-F) Western blotting analysis of TXNIP expression in DLD1 cells (E) or HCT15 cells (F)  
276 treated with oxaliplatin at different doses for 48h. (G-H) Immunoblot analysis of TXNIP in DLD1  
277 cells (G) or HCT15 cells (H) treated with N-acetyl-L-cysteine (1.25mM) or oxaliplatin (10 $\mu$ m) or the  
278 combinational treatment for 48h. (I-J) Quantification of MLXIP (MondoA), TXNIP and ARRDC4  
279 mRNA in DLD1 cells (I) or HCT15 cells (J) upon knockdown of MLXIP by siRNA after treatment  
280 with 10 $\mu$ m oxaliplatin treatment for 48h. (K-L) Immunoblot analysis of TXNIP expression in  
281 MondoA-knockout DLD1 cells (K) or HCT15 cells (L) after 10 $\mu$ m oxaliplatin treatment for 48h. (M)  
282 MondoA occupancy on the promoters of *TXNIP* in DLD1 cells treated with 10 $\mu$ m oxaliplatin or the  
283 combinational treatment with NAC (1.25mM) for 48h. Results shown, excluding A and B, are  
284 representative of three independent experiments. All values were expressed as mean  $\pm$  SEM. Two-  
285 tailed Student's t test; \*\*p<0.01, \*\*\*p < 0.001, \*\*\*\*p < 0.0001, vs. Control.

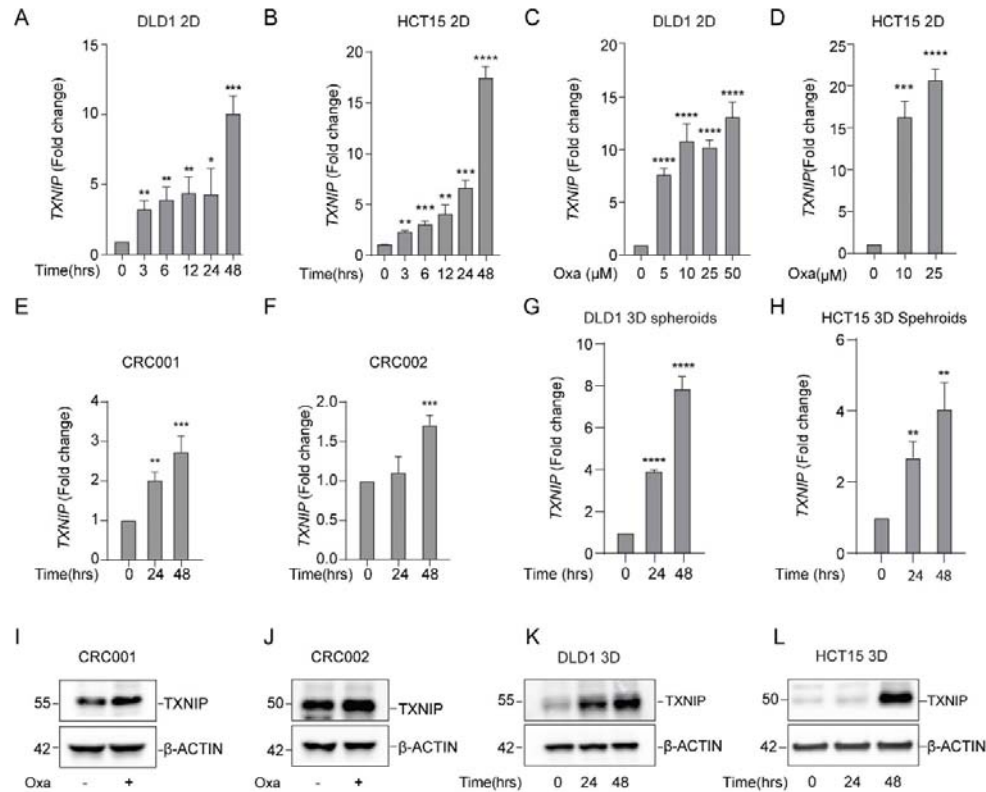

286

287 **Figure S2. TXNIP expression is induced by oxaliplatin in different CRC models. (A-B)**

288 Assessment of *TXNIP* mRNA expression in DLD1 cells (A) or HCT15 cells (B) treated with

289 oxaliplatin by q-RT-PCR analysis. Cells were treated with 10μM oxaliplatin and harvested at

290 indicated time points. (C-D) q-RT-PCR analysis of *TXNIP* mRNA in DLD1 cells (C) or HCT15 cells

291 (D) treated with oxaliplatin for 48h at indicated concentrations. (E-F) q-RT-PCR analysis of *TXNIP*

292 mRNA in two different PDTOs treated with 10μm oxaliplatin for indicated time periods. (G-H) q-RT-

293 PCR analysis of *TXNIP* mRNA in DLD1 (G) or HCT15 (H) spheroids treated with 10μm oxaliplatin

294 for indicated time periods. (I-J) Western blotting analyses of TXNIP post oxaliplatin treatment

295 (10μm) in two different PDTOs for 48h. (K-L) Western blotting of TXNIP in DLD1 (K) or HCT15 (L)

296 spheroids treated with 10μm oxaliplatin for 48h. Results shown are representative of three

297 independent experiments. All values were expressed as mean ± SEM. \*p<0.1, \*\*p<0.01,

298 \*\*\*p < 0.001, \*\*\*\*p < 0.0001, vs. Control.

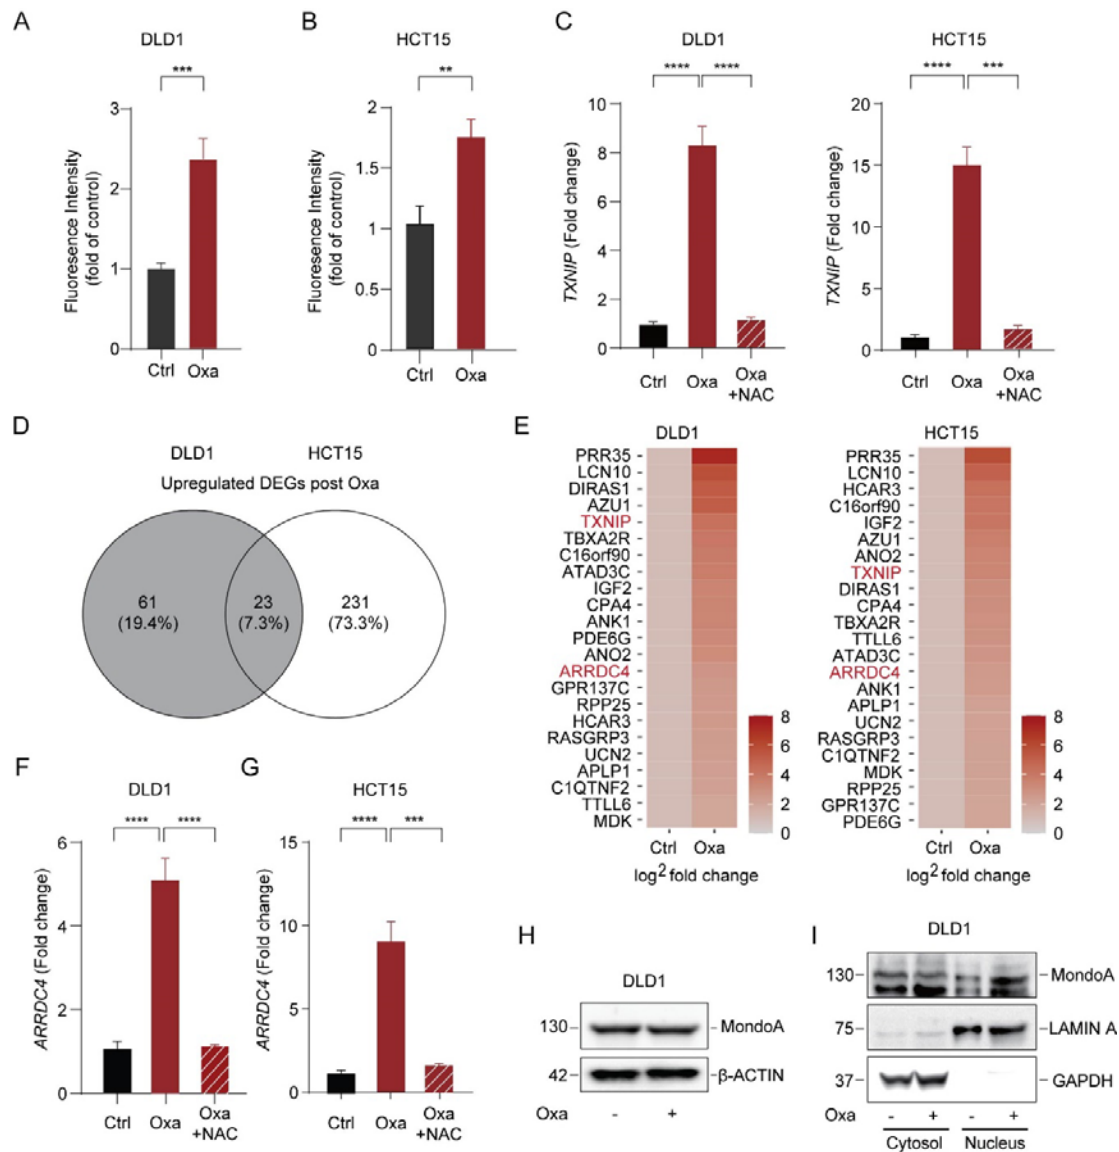

299

300 **Figure S3. ROS drive the induction of TXNIP by inducing MondoA activity.** (A-B) DLD1 cells  
 301 (A) and HCT15 cells (B) were treated with 10 $\mu$ m oxaliplatin with ROS measured at 48h. (C) qRT-  
 302 PCR analysis of *TXNIP* mRNA in DLD1 cells (left panel) or HCT15 cells (right panel) treated with  
 303 N-acetyl-L-cysteine (NAC) (1.25mM) or oxaliplatin (10 $\mu$ m), or combinational treatment, for 48h. (D)  
 304 Overlapping DEGs (>4-fold change; Padj<0.05) from live DLD1 and HCT15 cells, after 48h of  
 305 10 $\mu$ m oxaliplatin treatment, as determined by RNA sequencing. (E) Heatmap showing 23  
 306 overlapping transcripts from D, in DLD1 cells (left panel) and HCT15 cells (right panel). (F-G) qRT-  
 307 PCR analysis of *ARRDC4* mRNA in DLD1 cells (F) and HCT15 cells (G) treated with with NAC  
 308 (1.25mM) or oxaliplatin (10 $\mu$ m), or combinational treatment, for 48h. (H) Immunoblot analysis of  
 309 MondoA expression in DLD1 cells after 10 $\mu$ m oxaliplatin treatment for 48h. (I) Effects of oxaliplatin

310 treatment (10 $\mu$ m for 48h) on subcellular localization of MondoA assessed by cell fractionation and  
311 immunoblotting, in DLD1 cells. LAMIN A - a nuclear marker, GAPDH - a cytoplasmic marker.  
312 Results shown are representative of three independent experiments. All values were expressed as  
313 mean  $\pm$  SEM. \*\*p<0.01, \*\*\*p < 0.001, \*\*\*\*p < 0.0001, vs. Control

#### 314 **TXNIP regulates the expression and secretion of GDF15**

315 TXNIP has been reported to regulate both the innate and adaptive arms of the immune  
316 system<sup>54</sup>. In support of this, we found TXNIP expression to be positively associated with  
317 the expression of T cell markers, antigen presentation and cytokine transcripts when using  
318 the COAD TCGA dataset (Figure S4A). The enrichment of TXNIP in the cytoplasm  
319 indicated that TXNIP may mediate anti-tumor effects by regulating immunologically  
320 relevant cytoplasmic processes (Figure S4B-C)<sup>55</sup>, for example, the NLRP3  
321 inflammasome<sup>55</sup>. The formation and activation of the NLRP3 inflammasome leads to self-  
322 cleavage and activation of caspase 1, which in turn promotes the release of the pro-  
323 inflammatory cytokine IL-1 $\beta$ . However, the correlation between TXNIP and IL-1 $\beta$  or IL-18  
324 was not significant (Figure S4A). Similarly, knockout of TXNIP led to no alteration in  
325 caspase 1 activation and IL-1 $\beta$  production (Figure S4D-E), with no detectable IL-1 $\beta$   
326 protein in the supernatants, suggesting TXNIP failed to activate the NLRP3 inflammasome  
327 upon chemotherapeutic treatment.

328

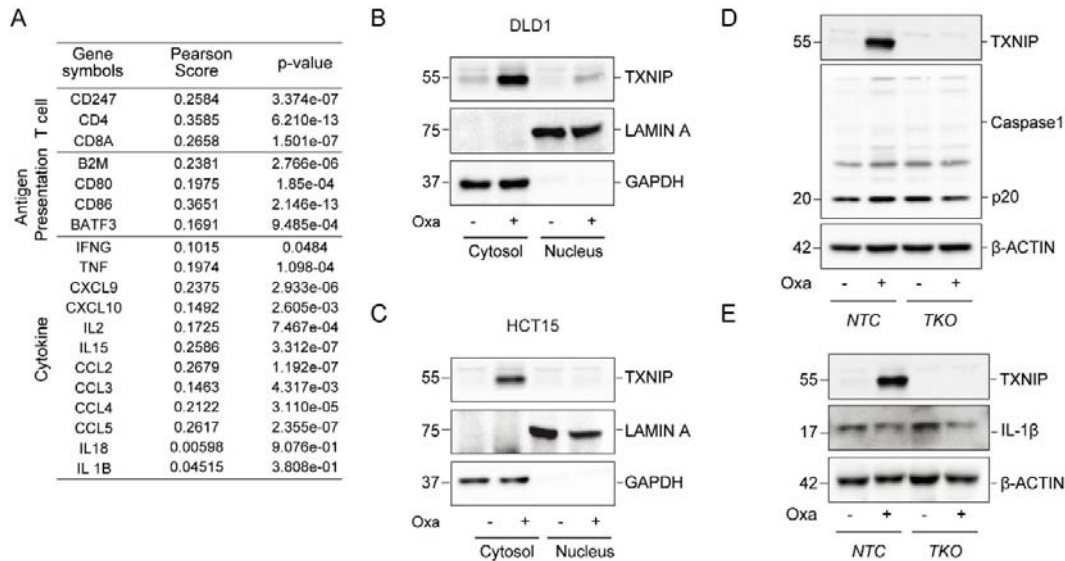

329

330 **Figure S4. TXNIP is associated with immune activation, which is independent of**  
 331 **inflammasome activity.** (A) Pearson correlation coefficient scores and p values showing the  
 332 relationship between *TXNIP* transcript expression and different immune marker transcript  
 333 expression; including T cell markers (*CD247*, *CD4*, *CD8A*), antigen presentation markers (*B2M*,  
 334 *CD80*, *CD86*, *BATF3*) and cytokines (*IFNG*, *TNF*, *CXCL9*, *CXCL10*, *IL2*, *IL15*, *CCL2*, *CCL3*, *CCL4*,  
 335 *CCL5*, *IL18*, *IL1B*) from the TCGA COAD dataset. (B-C) Effects of oxaliplatin (10 $\mu$ m for 48h) on  
 336 subcellular localization of TXNIP assessed by cell fractionation and immunoblotting in DLD1 cells  
 337 (B) and HCT15 cells (C). (D-E) Immunoblot analysis of cleaved caspase 1(p20) (D) and IL-1 $\beta$  (E) in  
 338 control (NTC) and TXNIP-KO (TKO) DLD1 cells with/ without 10 $\mu$ m oxaliplatin treatment for 48h.  
 339 Results shown are representative of three independent experiments.

340 We therefore considered whether TXNIP may be capable of regulating the expression  
 341 and/or secretion of other immunologically-relevant soluble factor(s) from the epithelial cell.  
 342 To this end, we performed mass-spectrometric analysis of supernatants collected from  
 343 non-targeting control (NTC) and TXNIP-KO (TKO) DLD1 cells and identified a total of 832  
 344 proteins from the conditional media and 157 differentially expressed soluble proteins  
 345 ( $p < 0.05$ ). Protein data can be found from Supplementary Table 3. Growth/Differentiation  
 346 Factor 15 (GDF15) was the most highly differentiated secreted protein associated with  
 347 TXNIP loss (Figure 3A). This result was confirmed using a cytokine array, where GDF15

348 was additionally seen to be secreted at lower levels in response to oxaliplatin; in line with  
349 the upregulation of TXNIP (Figure 3B). These results showed that oxaliplatin decreases  
350 GDF15 secretion in a TXNIP dependent manner, and that the knockout of TXNIP alone  
351 could drive the secretion of GDF15. Intriguingly, other factors were seen to be altered in a  
352 similar manner, for example plasminogen activating inhibitor (PAI-1; SERPINE1. Figure  
353 3B Row I, columns 1 and 2) suggestive of a TXNIP dependent signature which is broadly  
354 indicative of wound-healing, however with the proteomics showing GDF15 as the  
355 dominant factor, we focussed on this pathway.

356 Having established the dependence of GDF15 on TXNIP, we next assessed the effects of  
357 oxaliplatin treatment on GDF15. The downregulation of GDF15 was more pronounced at  
358 later time points and higher drug dosages; the opposite trend to TXNIP (Figure S5A-B).  
359 Using Western blotting we showed that TXNIP knockout rescued the inhibitory effects of  
360 oxaliplatin on GDF15 expression in DLD1 cells (Figure 3C, E), with a similar pattern being  
361 observed in TXNIP-KO HCT15 cells (Figure 3D, F). In contrast, TXNIP-overexpressing  
362 DLD1 cells showed lower GDF15 expression compared to control cells (Figure S5C-D).  
363 We quantitated soluble GDF15 concentrations by ELISA finding >5ng/ml in the  
364 supernatant of TXNIP-KO cells (Figure 3G), whilst a higher expression of GDF15 was also  
365 detected in TXNIP-KO PDOs (Figure 3H). Next, using confocal imaging, we observed  
366 GDF15 was enriched in the cytoplasm in untreated cells, suggestive of it being stored in  
367 secretory granules, with no staining seen after oxaliplatin treatment. In line with  
368 immunoblot analysis, confocal imaging showed TXNIP-KO cells expressed more GDF15,  
369 which, unlike the control, was retained after oxaliplatin treatment (Figure 3I, S5E).

370 As ROS mediated the activation of the MondoA-TXNIP axis, we aimed to assess the  
371 effect of these factors on GDF15 expression. In line with our previous findings, knocking  
372 down MondoA decreased the expression of TXNIP, but increased GDF15 expression  
373 (Figure 3J, S5F), suggesting the involvement of MondoA in the regulation of GDF15  
374 expression. Furthermore, pre-incubation of the target cells with NAC abolished the

375 suppression of GDF15 by oxaliplatin, which was partially rescued by overexpressing  
 376 TXNIP (Figure S5F), suggestive of the important role of ROS in GDF15 regulation.  
 377 Collectively, these data demonstrated the activation of MondoA by ROS modulates both  
 378 TXNIP and GDF15.

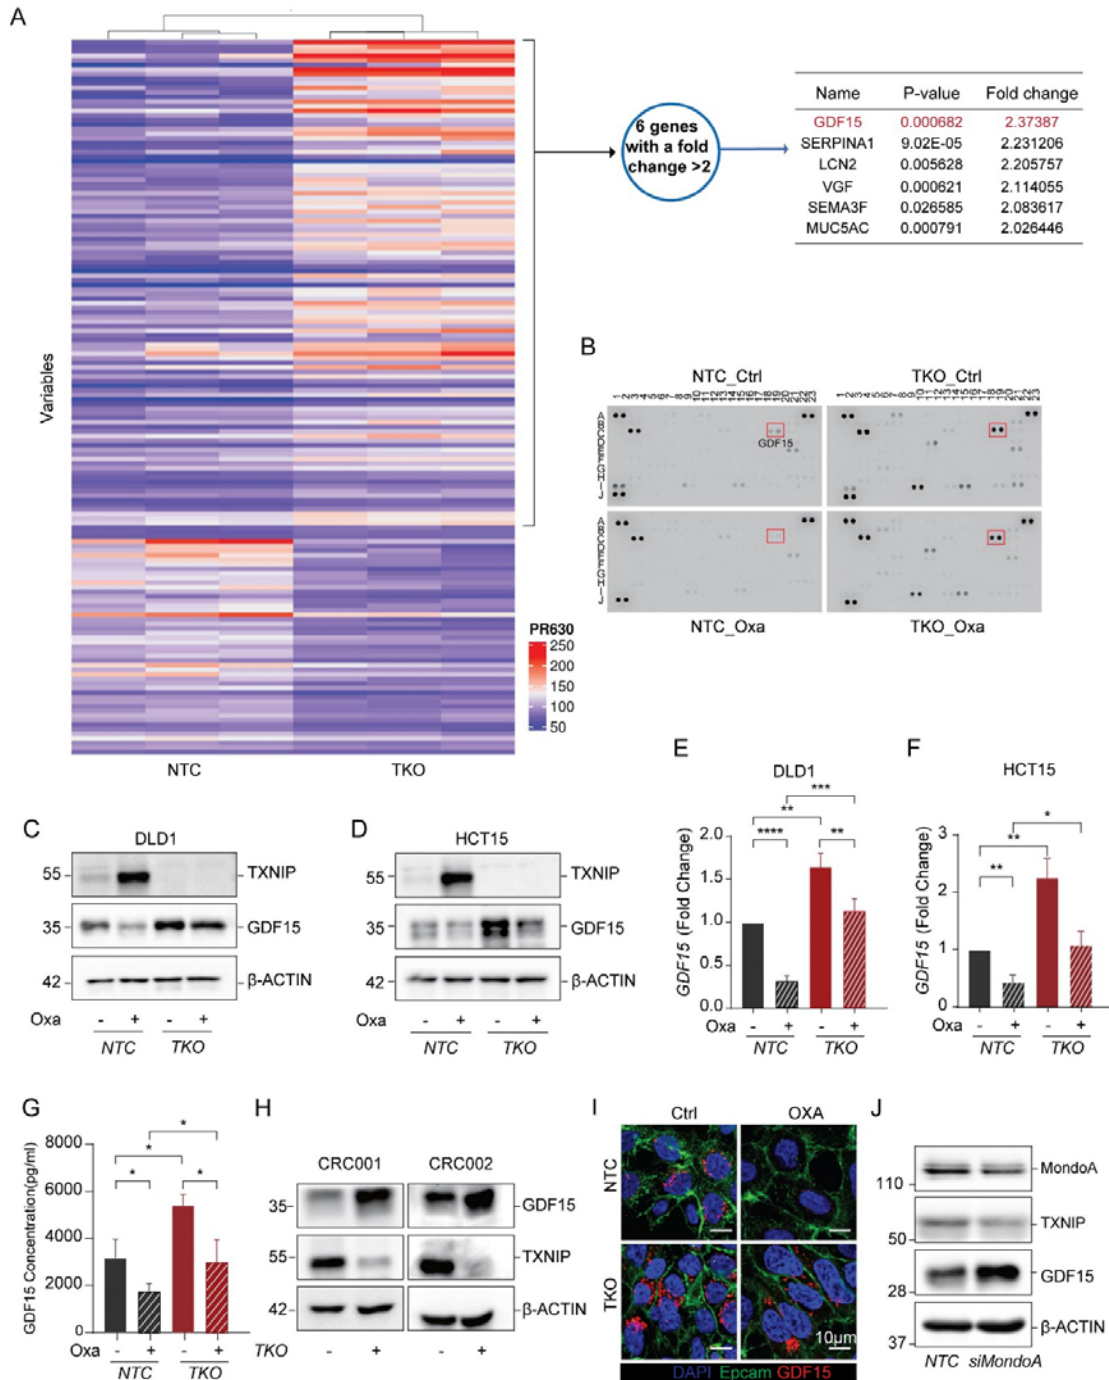

380 **Figure 3. TXNIP regulates GDF15 expression.** (A) Proteomic analysis of the conditional media  
 381 from TXNIP-KO (TKO) and control (NTC) DLD1 cells as assessed by mass spectrometry. Heatmap  
 382 illustrating differentially expressed proteins (left panel) and table showing the top six upregulated  
 383 proteins in conditional media from TKO cells (right table). (B) 105 plex cytokine arrays incubated  
 384 with conditional media from TKO and NTC cells with or without 10µM oxaliplatin treatment for 48h.  
 385 The respective GDF15 spot is highlighted (red box). (C-D) Immunoblotting of TXNIP and GDF15 in  
 386 NTC and TKO DLD1 cells (C) and NTC and TKO HCT15 cells (D) with or without drug treatment  
 387 (10µM oxaliplatin for 48h). (E-F) Pooled densitometry data from 3 repeats of C and D. Standard  
 388 error bars shown. (G) GDF15 concentration in conditional media for E were determined by ELISA.  
 389 Standard error bars are shown. (H) Immunoblot of TXNIP and GDF15 in NTC (TKO-) and TKO  
 390 (TKO+) PDOs: CRC001 (left panel), CRC002 (right panel). (I) Immunofluorescent detection of  
 391 GDF15 in NTC and TKO DLD1 cells with or without 10µM oxaliplatin treatment for 48h as assessed  
 392 by confocal microscopy. DAPI (blue), Epcam (green), GDF15 (red). (J) Immunoblotting of MondoA,  
 393 TXNIP and GDF15 in MondoA-knockdown (siMondaA) and control (NTC) DLD1 cells. Results  
 394 shown are representative of three independent experiments. All values were expressed as  
 395 mean ± SEM. Two-tailed Student's t test; \*p<0.05, \*\*p<0.01, \*\*\*p < 0.001, \*\*\*\*p < 0.0001, vs. Control.

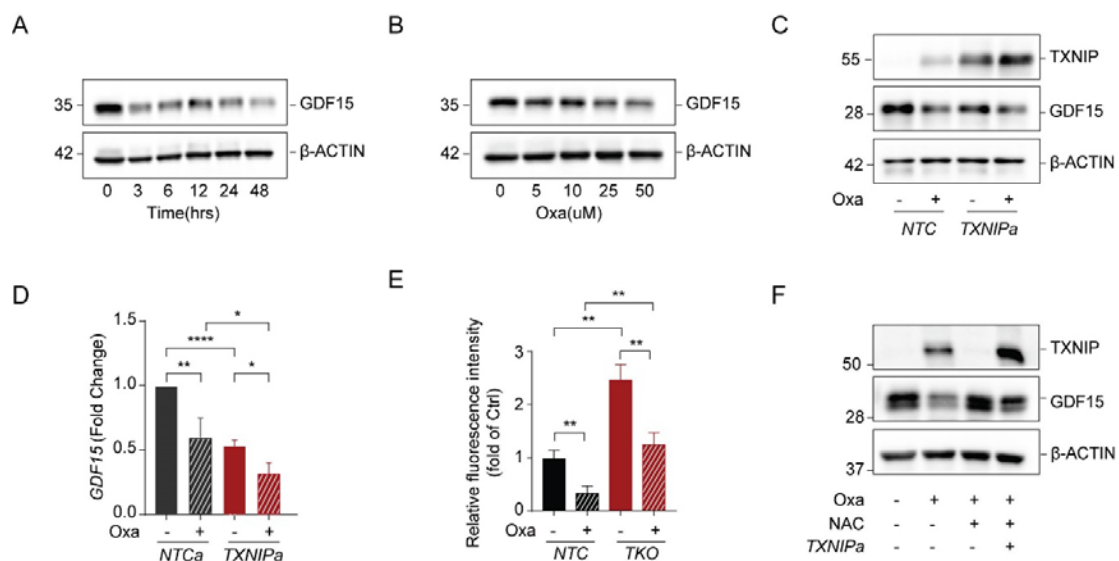

396  
 397 **Figure S5. Oxaliplatin treatment and TXNIP suppress GDF15 expression.** (A-B)  
 398 Immunoblotting of GDF15 in DLD1 cells after treatment with 10µM oxaliplatin at indicated time  
 399 points. (A); after treatment of different dosages of oxaliplatin for 48 hours (B). (C-D)



400 Immunoblotting of TXNIP and GDF15 in control (NTC) and TXNIP-overexpressing (TXNIPa) DLD1  
401 cells with or without 10 $\mu$ m oxaliplatin treatment for 48h (C); pooled densitometric data from C (D).  
402 Standard error bars are shown n=3. (E) Quantitation of immunofluorescence from Figure 3I  
403 (GDF15 levels relative to cell area) from 3 independent experiments. (F) Immunoblotting of TXNIP  
404 and GDF15 in TXNIPa or NTC cells treated with oxaliplatin (10 $\mu$ m) or combined treatment with  
405 oxaliplatin and NAC (1.25mM) for 48h. Results shown are representative of three independent  
406 experiments. All values were expressed as mean  $\pm$  SEM. \*p<0.1, \*\*p<0.01, \*\*\*\*p < 0.0001, vs.  
407 Control.

#### 408 **GDF15 expression is upregulated in CRC and associated with poor prognosis**

409 Consistent with previous reports<sup>34</sup>, GDF15 was observed to be upregulated in CRC tumor  
410 samples in comparison with normal tissue or epithelial cells by both TCGA COAD and  
411 scRNA epithelial sequencing analyses respectively (Figure S6A-B). This observation was  
412 validated by IHC staining (Figure 4A-B). To assess if the inverse relationship of TXNIP  
413 and GDF15 we had observed *in vitro* could be observed *in situ*, we assessed relative  
414 transcriptomic and protein expression using the TCGA COAD dataset and historic patient  
415 samples respectively, finding the same inter-relationship (Figure 4C-D). Using the same  
416 pre-T and post-T fresh patient samples described in Figure 1, we probed for GDF15,  
417 finding decreased GDF15 expression after treatment, except for the same three  
418 aggressive cases which had previously been shown to show no increased TXNIP  
419 expression (Figure 4E-G).

420 We then sought to understand the clinical relevance of GDF15 in CRC. When assessing  
421 for the impact of increased expression of GDF15 on survival, we found associations  
422 between low GDF15 and improved outcome at the protein level in tissue (Figure 4H-I),  
423 and in two independent public transcriptomic datasets (Figure S6C,D), suggesting that  
424 GDF15 contributes to tumor progression in CRC. In an opposite manner to TXNIP,  
425 GDF15 showed a significantly positive correlation with clinical stage and lymph node  
426 metastasis in CRC specimens (Table 3 and Table 4)

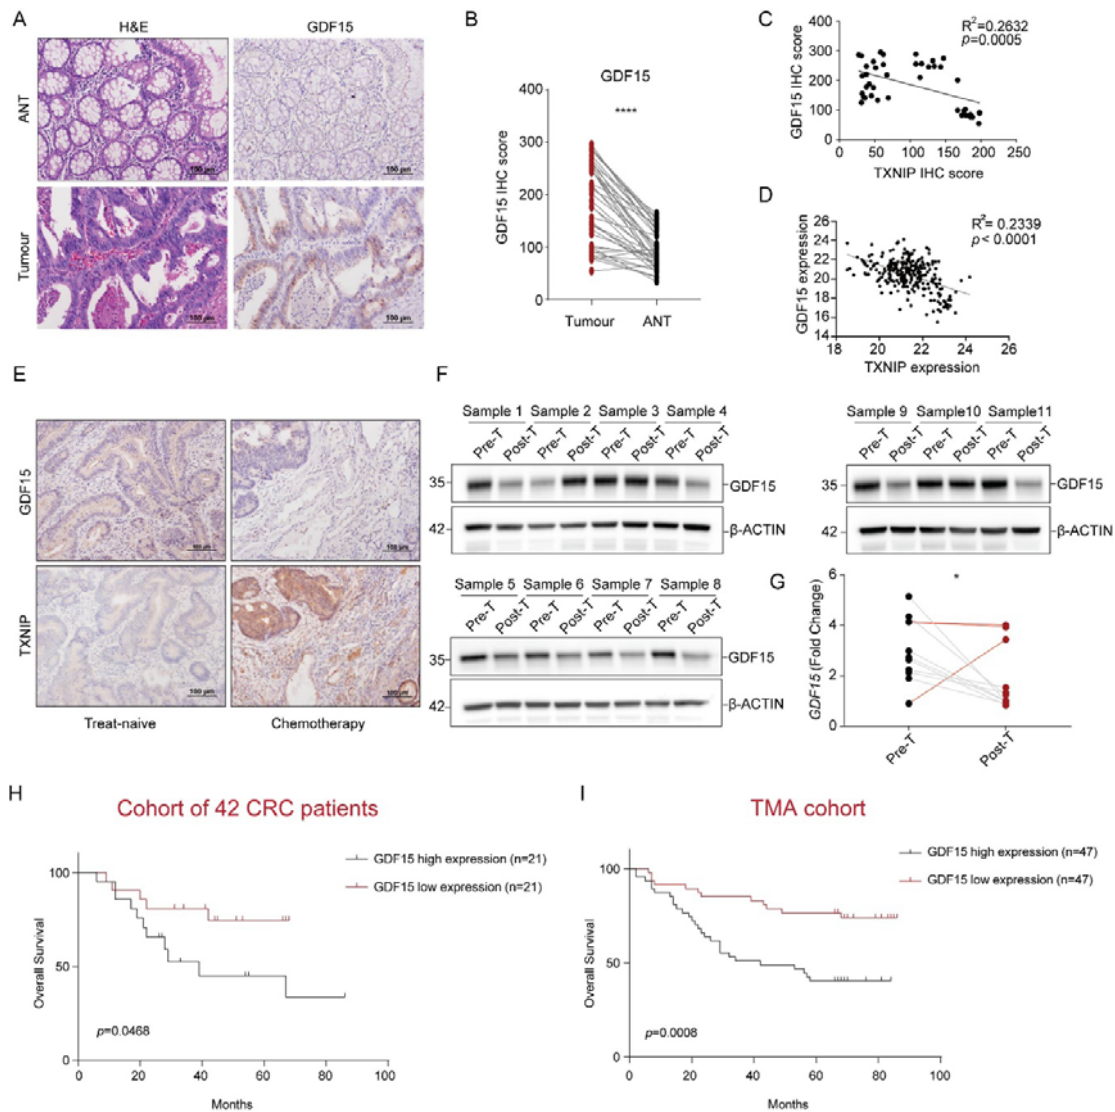

427

428 **Figure 4. Higher GDF15 expression is observed in CRC tumor samples, however it is**  
 429 **decreased post-chemotherapeutic treatment. High levels of GDF15 are associated with poor**  
 430 **prognosis.** (A) Detection of GDF15 in both tumor and adjacent normal tissue (ANT) samples from  
 431 patients with primary colorectal cancer. Magnification  $\times 200$ . (B) Statistical analysis of GDF15 IHC  
 432 score between ANT and tumor tissue (n=42). (C-D) Correlations of TXNIP and GDF15  
 433 protein (cohort of 42 CRC patients) (C) and TXNIP and GDF15 transcripts (TCGA COAD) (D).  
 434 Pearson correlation coefficients ( $R^2$ ) are indicated. (E) Sequential sections from colorectal tumor  
 435 samples collected pre- and post- neo-adjuvant chemotherapy. Detection of TXNIP and GDF15 by  
 436 IHC. (F) GDF15 expression in 11 paired treatment-naïve (Pre-T) tumor samples and oxaliplatin-  
 437 based neo-adjuvant chemotherapy treated tumor samples (Post-T). (G) GDF15 mRNA levels in

438 samples from F (aggressive cases highlighted in red). (H-I) Kaplan–Meier analysis of overall  
439 survival in CRC patients with different GDF15 staining scores from a cohort of 42 CRC patients (H)  
440 and CRC tumor tissue microarray (n=94) (I). Results shown are representative of three  
441 independent experiments. All values were expressed as mean  $\pm$  SEM. \* $p < 0.05$ , \*\*\*\* $p < 0.0001$ , vs.  
442 Control.

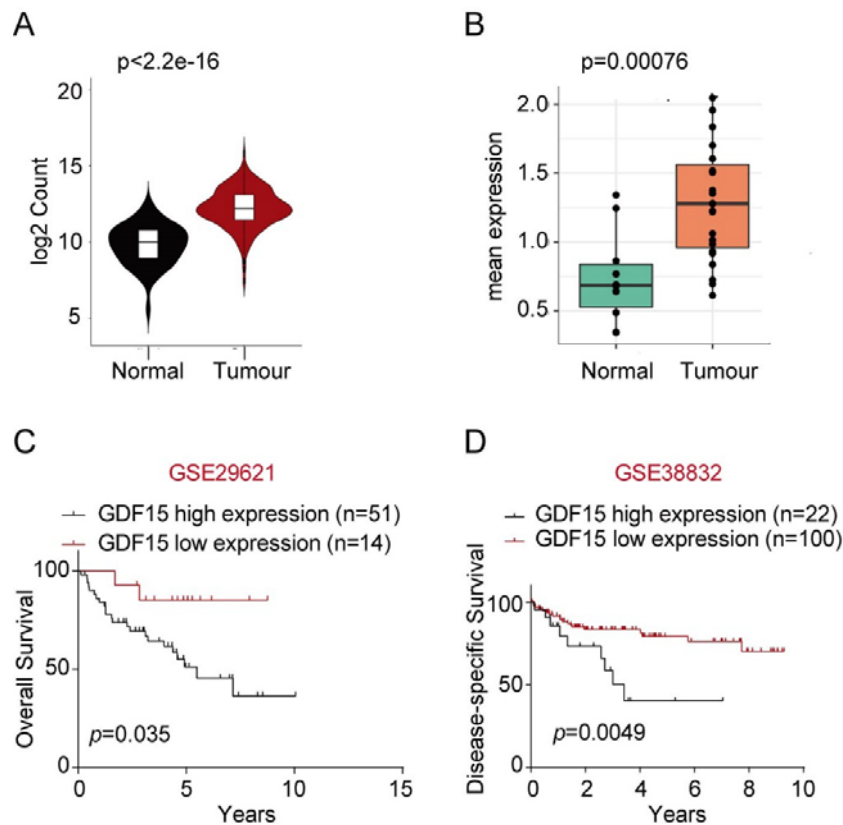

443

444 **Figure S6. GDF15 expression is higher in colorectal cancer samples compared to normal**  
445 **tissues.** (A) Analysis of The Cancer Genomic Atlas (TCGA) Colon Adenocarcinoma (COAD)  
446 database. Comparative analysis of expression of GDF15 between adjacent normal tissue and  
447 cancer tissues. Wilcoxon rank-sum test p value indicated. (B) GDF15 transcript expression in  
448 single epithelial cells derived from matched primary CRC tumors and adjacent normal colon (n=10  
449 pairs). (C-D) Kaplan-Meier analysis of overall survival (C) and distant metastasis-free survival (D)  
450 in CRC patients with different GDF15 mRNA expression levels.

451 Table 3

452 Association between GDF15 expression and clinicopathological features of patients with  
453 colorectal cancer in the cohort of 42 CRC patients

|                | Total<br>(n = 42) | GDF15 expression |                  | P value |
|----------------|-------------------|------------------|------------------|---------|
|                |                   | Low<br>(n = 21)  | High<br>(n = 21) |         |
| Gender         |                   |                  |                  | >0.9999 |
| Male           | 22                | 11               | 11               |         |
| Female         | 20                | 10               | 10               |         |
| Age(year)      |                   |                  |                  | 0.7171  |
| <65            | 32                | 15               | 17               |         |
| ≥65            | 10                | 6                | 4                |         |
| T stage        |                   |                  |                  | 0.4520  |
| T1-T2          | 9                 | 6                | 3                |         |
| T3-T4          | 33                | 15               | 18               |         |
| N stage        |                   |                  |                  | 0.0219* |
| N0             | 14                | 11               | 3                |         |
| N1+N2+N3       | 28                | 10               | 18               |         |
| M stage        |                   |                  |                  | 0.0017* |
| M0             | 25                | 18               | 7                |         |
| M1             | 17                | 3                | 14               |         |
| Clinical stage |                   |                  |                  | 0.0219* |
| I/II           | 14                | 11               | 3                |         |
| III/IV         | 28                | 10               | 18               |         |

\*P<0.05

454 Table 3

455 Association between GDF15 expression and clinicopathological features of patients with  
456 colorectal cancer in TMA cohort

|        | Total<br>(n = 96) | GDF15 expression |                  | P value |
|--------|-------------------|------------------|------------------|---------|
|        |                   | Low<br>(n = 48)  | High<br>(n = 48) |         |
| Gender |                   |                  |                  |         |

|                |    |    |    |          |
|----------------|----|----|----|----------|
| Male           | 52 | 27 | 25 | 0.6820   |
| Female         | 44 | 21 | 23 |          |
| Age(year)      |    |    |    |          |
| <65            | 44 | 22 | 22 | >0.9999  |
| ≥65            | 52 | 26 | 26 |          |
| T stage        |    |    |    |          |
| T1-T2          | 3  | 3  | 0  | 0.2419   |
| T3-T4          | 90 | 44 | 46 |          |
| N stage        |    |    |    |          |
| N0             | 55 | 41 | 14 | <0.0001* |
| N1+N2+N3       | 40 | 7  | 33 |          |
| M stage        |    |    |    |          |
| M0             | 93 | 48 | 45 | 0.2421   |
| M1             | 3  | 0  | 3  |          |
| Clinical stage |    |    |    |          |
| I/II           | 54 | 40 | 13 | <0.0001* |
| III/IV         | 40 | 7  | 33 |          |

---

\* $P < 0.05$

457

458 **The role of TXNIP-GDF15 axis in immune regulation**

459 GDF15 has been reported to have multiple immunological impacts however some reports  
460 have been queried owing to the discovery of contaminating TGF-  $\beta$ 1 in recombinant  
461 GDF15 preparations<sup>56</sup>. As such, to explore the immune impacts of GDF15, we opted to  
462 predominantly use cellular systems and resultant conditioned supernatant (Figure S7A-B).

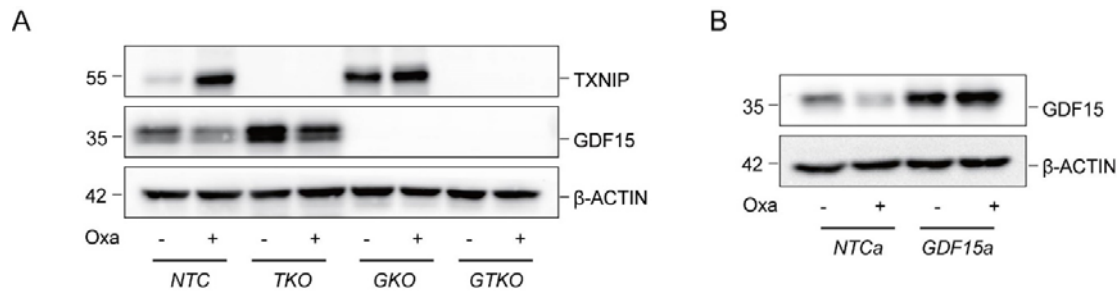

463

464 **Figure S7. Establishment of knock-out and over-expressing DLD1 cell models (A)**

465 Immunoblot of TXNIP and GDF15 expression in NTC, GDF15 knockout (GKO), TKO, GDF15 and

466 TXNIP knockout (GTKO) DLD1 cell lines after 48h of oxaliplatin treatment (10 $\mu$ m). (B) Immunoblot

467 of GDF15 expression in GDF15-CRISPRa (GDF15a) DLD1 cell line in the presence of 10 $\mu$ m

468 oxaliplatin for 48h. Results shown are representative of three independent experiments.

469

470 When stimulating PBMCs with anti-CD3 and anti-CD28 in the presence of GDF15-

471 enriched conditioned media from the TXNIP KO cell line, we observed a small but

472 significant decrease in cell number, that was reversed using supernatant from a TXNIP /

473 GDF15 double KO cell line (Figure 5A-B). Further analysis showed that both CD8 and

474 CD4 T cell proliferation was inhibited by GDF15 enriched supernatant (Figures 5C-F), with

475 IFN $\gamma$  concentrations in the supernatant also being seen to lower (Figure 5G-H).

476 A recent paper has shown that GDF15 is able to drive the differentiation of regulatory T

477 cells (Tregs) from naïve CD4s via CD48 ligation<sup>42</sup>. Working on the hypothesis that it was

478 Tregs that were inhibiting the T cell proliferation and IFN $\gamma$  release within the mixed PBMC

479 population, we observed a GDF15-dependent increase of Foxp3 within the CD4 pool

480 (Figure 5I), however to a much lesser extent than when using active TGF $\beta$ 1 (Figure 5J).

481 To support these data we assessed for associations between GDF15 and FOXP3/Foxp3

482 in TCGA COAD dataset and our historic 42 patient cohort respectively, finding a

483 significantly positive correlation between GDF15 and FOXP3 and enrichment of Foxp3 in

484 the GDF15 high cases (Figure 5K-L). Finally, when stimulating naïve CD4 T cells in the

485 presence of GDF15 enriched supernatant we were able to both differentiate these cells

486 into functional Tregs and also block this functionality using an anti-CD48 antibody (Figure  
487 5M-N).

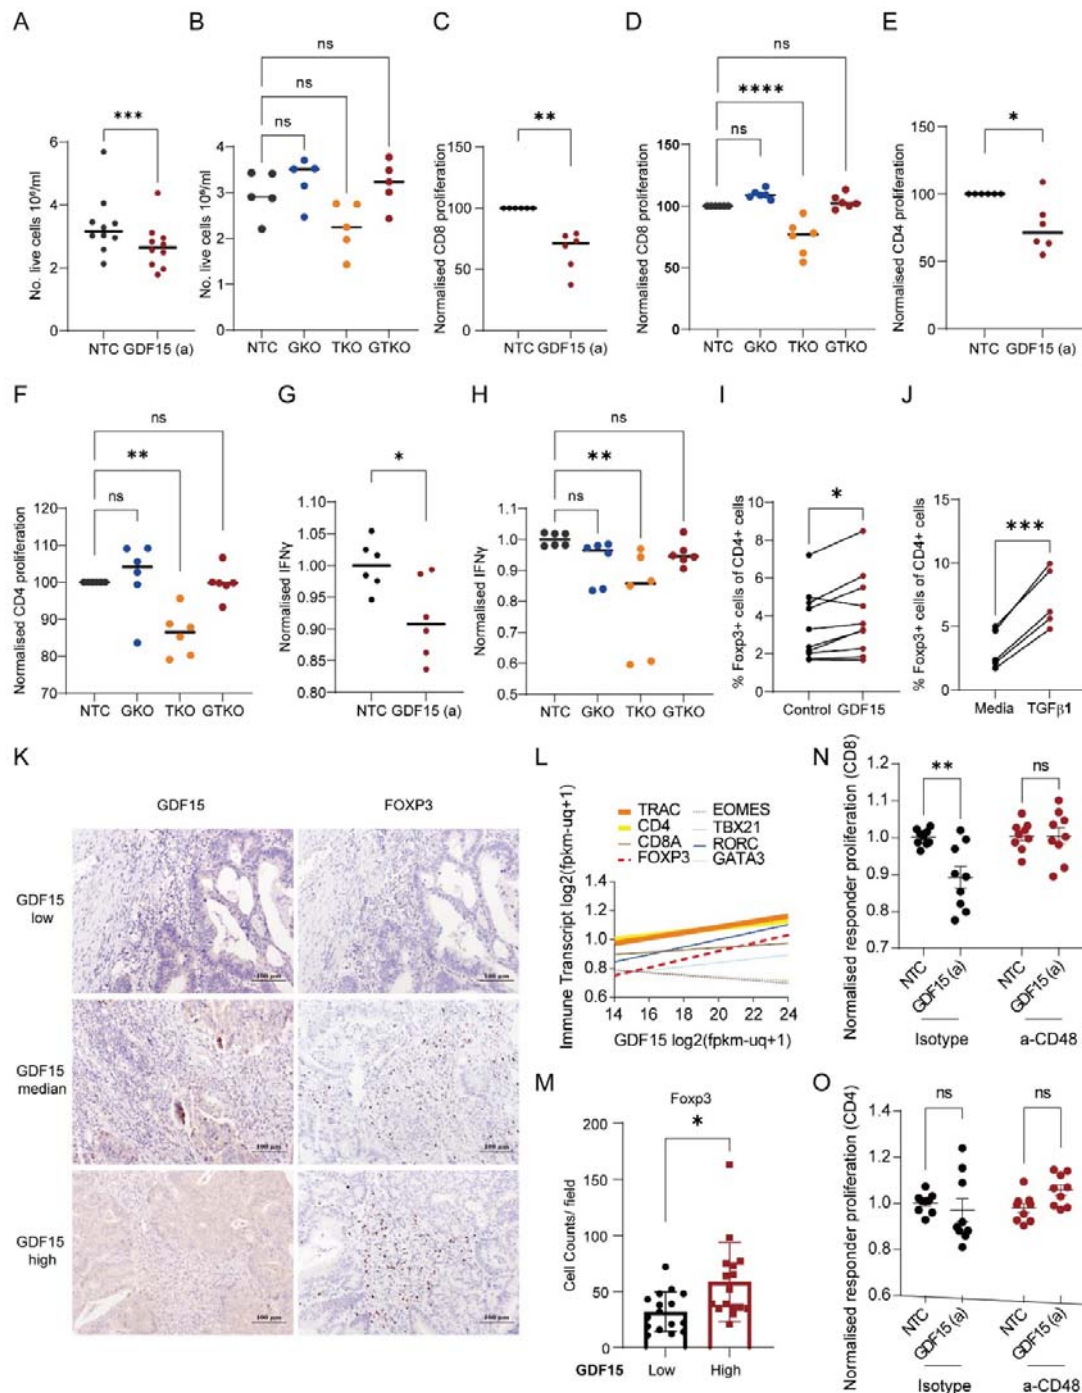

488

489 **Figure 5. GDF15 induces Tregs in a CD48 dependent manner.** (A-B) PBMCs were stimulated  
490 with anti-CD3 and anti-CD28 for 4 days in the presence of fresh supernatant from indicated cell

491 lines (NTC,GKO,TKO,GTKO; GDF15a). Live cells were counted using trypan blue and a  
492 haemocytometer. n=10 (A) and n=5 (B). (C-F) Labelled PBMCs were stimulated with anti-CD3 and  
493 anti-CD28 for 4 days in the presence of fresh supernatant from indicated cell lines, before being  
494 stained with anti-CD3 and anti-CD8 (C-D) or anti-CD4 (E-F) antibodies and measured by flow  
495 cytometry. Normalised proliferation on gated CD3<sup>+</sup>CD8<sup>+</sup> or CD3<sup>+</sup>CD4<sup>+</sup> cells is shown. n=6. (G-H)  
496 Normalised IFN $\gamma$  concentrations in the supernatant of cells from C-F. (I-J) PBMCs were stimulated  
497 with anti-CD3 and anti-CD28 for 4 days in the presence of fresh supernatant from NTC or GDF15a  
498 cell lines (I) or media alone or 5ng/ml recombinant human TGF $\beta$ 1 (J). Cells were stained with anti-  
499 CD3, anti-CD4 antibodies extracellularly before intranuclear staining of Foxp3 was performed. % of  
500 CD4<sup>+</sup>Foxp3<sup>+</sup> cells are shown. n=10 (I) and n=5 (J). (K) Immunohistochemistry using anti-GDF15  
501 and anti-Foxp3 antibodies on serial sections from colorectal cancer cases. (L) Correlations of  
502 indicated immune transcripts (normalised for PTPRC[CD45] expression) and GDF15 transcripts  
503 from TCGA COAD dataset. Thick line indicates R<sup>2</sup> value >0.1 and dashed line indicates  
504 transcription factor. (M) Pooled data from K showing Foxp3<sup>+</sup> cell counts in GDF15<sup>low</sup> and GDF15<sup>high</sup>  
505 populations; median split. n=32. (N-O) Isolated naïve CD4 cells were stimulated with anti-CD3 and  
506 anti-CD28 for 4 days in the presence of indicated cell line supernatant and either isotype control  
507 (10 $\mu$ g/ml) or anti-CD48 (10 $\mu$ g/ml) as indicated. These cells were then co-cultured with anti-CD3  
508 stimulated proliferation dye labelled responder PBMCs for 4 days, before cells were stained for  
509 CD3, CD8 and CD4. Normalised proliferation dye (MFI) of the indicated responder population is  
510 shown. n=9. All values were expressed as mean  $\pm$  SEM. \*p < 0.05, \*\*p < 0.01, \*\*\*p < 0.001,  
511 \*\*\*\*p < 0.0001, vs. Control.

512

513 **Loss of TXNIP/GDF15 axis functionality in advanced disease and the use of pre-**  
514 **treatment GDF15/TXNIP ratio as a biomarker of clinical response.**

515 With high GDF15, Treg infiltration and CD8 T cell dysfunction all being shown to be  
516 associated with poor prognosis in CRC<sup>57-59</sup>, and with the vast majority of CRC patients  
517 being treated with oxaliplatin, we next considered whether the TXNIP/GDF15 axis, an axis  
518 which should regulate these processes to the benefit of the patient, remained functional in



519 metastatic disease. In the course of this project we had observed a clear distinction in the  
520 TXNIP/GDF15 response to oxaliplatin when looking at cell lines derived from primary and  
521 secondary sites (Figure 6A-B). This difference can be seen most clearly when assessing  
522 the ratio of GDF15 to TXNIP (GDF15/TXNIP) pre-treatment (Figure 6C). We next  
523 assessed if there was a difference in the correlation between TXNIP and GDF15 in  
524 metastatic and primary disease, finding the significant inverse relationship in primaries  
525 discussed earlier was lost in metastatic samples (Figure 6D-E). As resistance to  
526 chemotherapy is commonly observed in patients with metastatic disease, we developed  
527 two oxaliplatin-resistant lines, finding that they also lost oxaliplatin-induced TXNIP/GDF15  
528 responsiveness (Figure 6F-G), with GDF15/TXNIP ratios strongly resembling those of the  
529 cell lines derived from different sites (Figure 6H).

530 We next considered whether this oxaliplatin resistance-associated loss of TXNIP/GDF15  
531 responsiveness could be observed in progressive primary tumors. We first assessed  
532 TXNIP-GDF15 correlations in primary samples where chemotherapeutic response was  
533 known (non-responder vs responder) finding the inverse 'functional' relationship was only  
534 present in responders (Figure 6I-J). We then assessed our pre-treatment and post-  
535 treatment fresh tumour samples finding similar ratios to those observed in the cell line  
536 models when splitting the cohort into aggressive and non-aggressive disease (Figure 6K).  
537 These data collectively suggest that the loss of the responsive TXNIP/GDF15 axis  
538 (oxaliplatin inducing ROS, driving TXNIP upregulation via MondoA, leading to a decrease  
539 in GDF15 secretion) is associated with both disease progression and chemotherapeutic  
540 resistance.

541 We then questioned whether or not the pre-treatment ratio of GDF15/TXNIP could be  
542 used as a potential biomarker of oxaliplatin treatment responsiveness. To test this  
543 hypothesis we first assessed whether or not the ratio could be used to differentiate cell  
544 lines from primary or secondary sites (Figure S8E) or oxaliplatin resistant lines from non-  
545 resistant (Figure S8F) or aggressive from non-aggressive tumours (Figure S8G) as

546 controls. We then tested this ratio using a publicly available dataset finding that pre-  
547 oxaliplatin treatment GDF15/TXNIP ratio could be used to determine treatment response  
548 (Figure 6L). Interestingly this result was completely negated if oxaliplatin was combined  
549 with radiotherapy.

550 Finally, as the data clearly showed a differential in ratio change between pre and post  
551 treated 'aggressive' and 'non-aggressive' groups (definitions in the appropriate legend),  
552 we tested a new metric, post-treatment GDF15/TXNIP ratio divided by pre-treatment  
553 GDF15/TXNIP ratio (Figure S8H-J), to see if this would improve the overall differential.  
554 We found that by adopting the new metric not only did the combined differential increase  
555 (Mean of 6.82 vs 1.68 [fold change of 4.1] for single pre-treatment GDF15/TXNIP ratio  
556 against 0.05 vs 1.44 [fold change of 28.8] for the combined) but so did the significance  
557 (Figure 6M,N). Given that there are no publicly available datasets pre and post oxaliplatin  
558 treatment, we used organoids derived from primary tumours to test this new metric by  
559 measuring GDF15 and TXNIP pre and post treatment. Splitting the organoid groups into  
560 those with extra-mural invasion (considered more aggressive) and those without (less  
561 aggressive), we could see a significant difference between the groups (Figure 6O).

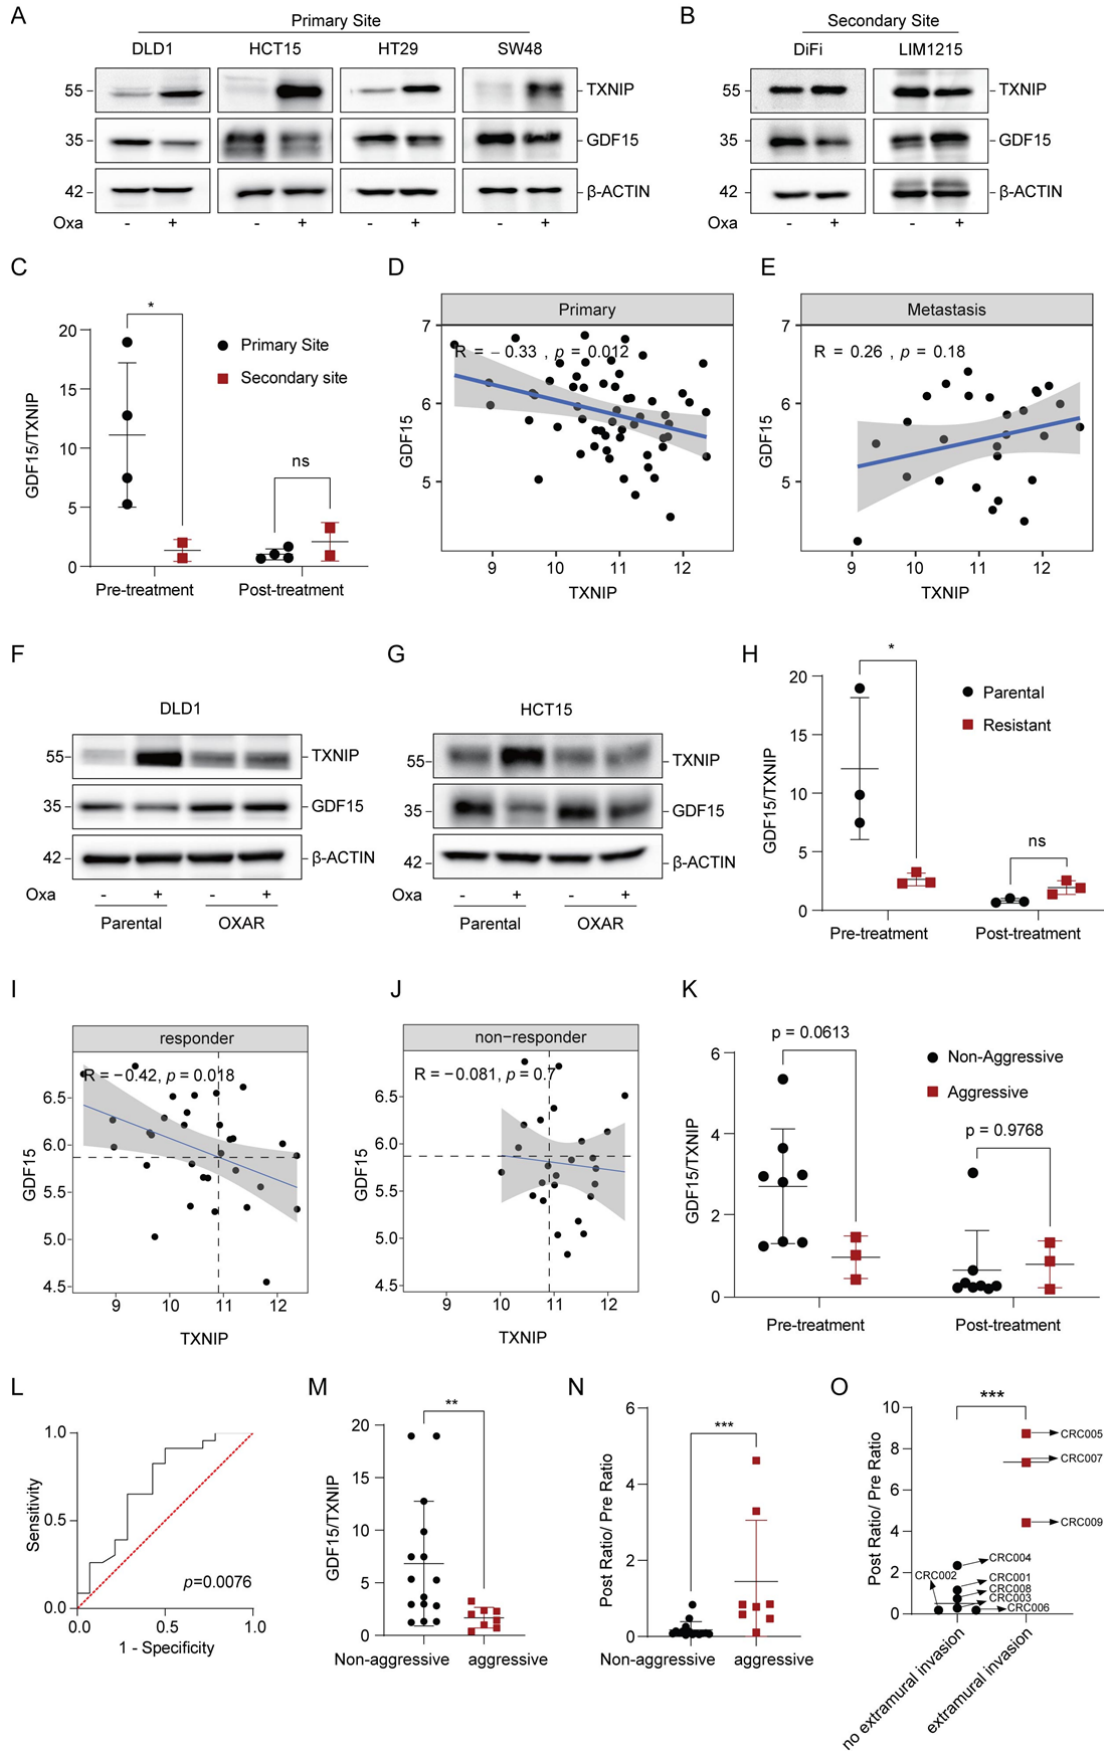

563 **Figure 6. Loss of a oxaliplatin responsive TXNIP/GDF15 axis is associated with advanced**  
564 **disease and chemotherapeutic resistance, and pre-treatment GDF15/TXNIP ratio can be**  
565 **used as a biomarker of treatment response.** (A-B) Immunoblot analysis of TXNIP and GDF15  
566 expression after 48h of 10 $\mu$ m oxaliplatin treatment in colorectal cancer cell lines, including DLD1,  
567 HCT15, HT29, SW48 (A, derived from primary site), and DiFi, LIM1215 (B, derived from secondary  
568 site). (C) Ratio of GDF15/TXNIP for cell lines in A-B treated as indicated and measured using  
569 densitometry. (D-E) Microarray data showing the correlation between GDF15 and TXNIP mRNA  
570 expression in primary (D) or metastatic (E) CRC tumors. R and p values shown (Pearson's). (F-G)  
571 Immunoblot analysis of TXNIP and GDF15 expression after 48h of 10 $\mu$ m oxaliplatin treatment in  
572 oxaliplatin-resistant (OXAR) cells: DLD1-OXAR (F) and HCT15-OXAR (G). (H) Ratio of  
573 GDF15/TXNIP for cell lines in F-G treated as indicated and measured using densitometry. (I-J)  
574 Microarray data showing the correlation between GDF15 and TXNIP mRNA expression in primary  
575 tumors that respond (responder; I) or do not respond (non-responder; J) to FOLFOX chemotherapy.  
576 R and p values shown (Pearson's). (K) Ratio of GDF15/TXNIP for primary tumours in Figures 1D  
577 and 4F treated as indicated as measured using densitometry. (L) Receiver operating characteristic  
578 (ROC) curve showing area under the curve and p values for the use of pre-treatment  
579 GDF15/TXNIP ratio in predicting responsiveness to oxaliplatin (O; responder [n=23] and non-  
580 responder [n=14]) using publicly available data. (M) Pooled pre-treatment data (ratio of  
581 GDF15/TXNIP) from C, H, K with 'aggressive' classed as secondary site, resistant to oxaliplatin  
582 and aggressive and 'non-aggressive' primary site, sensitive to oxaliplatin and non-aggressive (N)  
583 Post-treatment GDF15/TXNIP ratio divided by pre-treatment GDF15/TXNIP ratio for C, H, K.  
584 'Aggressive' and 'Non-aggressive' defined as in M. (O) Post-treatment GDF15/TXNIP ratio divided  
585 by pre-treatment GDF15/TXNIP ratio for patient derived organoids grouped into primary tumours  
586 with and without extra-mural invasion. \* p<0.05 using Sidak's multiple comparisons test (C, H, K) \*\*  
587 p<0.01 \*\*\* p<0.001 using Mann Whitney (M, N) or unpaired t test (O). Western results shown are  
588 representative of three independent experiments.

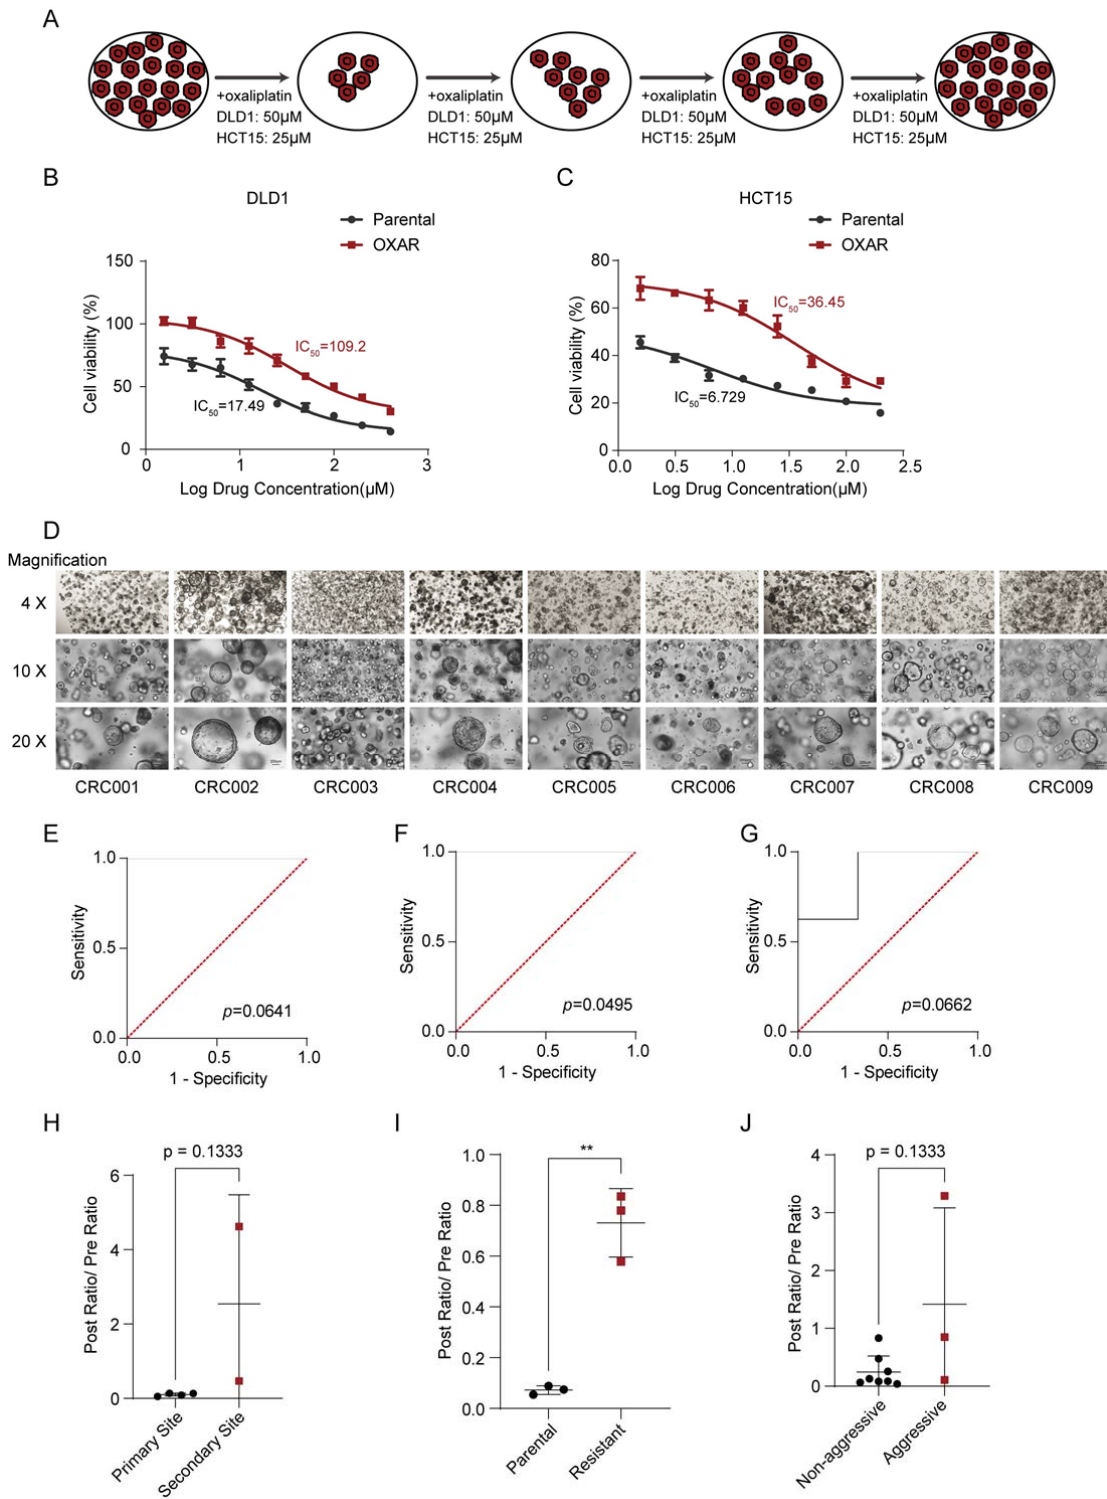

589

590 **Figure S8. Establishment of oxaliplatin-resistant cell lines and patient-derived tumor**  
 591 **organoids.** (A) A schematic model showing the process by which oxaliplatin-resistant CRC cells  
 592 were generated. (B-C) IC<sub>50</sub> values of oxaliplatin in oxaliplatin-resistant cells (OXAR) and their

593 parental cells. DLD1 and DLD1-OXAR (B); HCT15 and HCT15-OXAR (C). (D) Bright field images  
594 of different organoids at different magnifications. (E-G) Receiver operating characteristic (ROC)  
595 curves showing area under the curve and p values for the use of GDF15/TXNIP ratio in predicting  
596 origin of cell line (E; primary [n=4] or secondary [n=2]), sensitivity to oxaliplatin (F; parental [n=3] or  
597 resistant [n=3]), aggression of tumour (G; non-aggressive [n=8] or non-aggressive [n=3]). (H-J)  
598 Post-treatment GDF15/TXNIP ratio divided by pre-treatment GDF15/TXNIP ratio for primary or  
599 secondary cell line source (H), parental or resistant cell line (I), or aggression of fresh primary  
600 tumour (J). \*\* p<0.01 using unpaired t test. H and J tested using Mann-Whitney.

## 601 **Discussion**

602 Colorectal cancer is the third most common cancer worldwide, with 1.9 million cases  
603 reported in 2020. Five year survival ranges greatly, from 13-88%, depending on stage at  
604 presentation, age and sex<sup>60</sup>. Chemotherapy, predominantly oxaliplatin-based, is the most  
605 common first line therapy and has been increasingly shown to be capable of turning a  
606 'cold tumor' with low active immune infiltrate into a 'hot tumor' with improved infiltration.  
607 This conversion lays the foundation for current combinational chemo-immunotherapies,  
608 however, beyond innate stimulation through disease associated molecular patterns  
609 (DAMPs) and the presentation of neoantigens, our understanding into exactly how the  
610 immune system, especially the adaptive arm, is 'reawakened' is limited.

611 Although tumor suppressor genes (TSGs) are well known to function by targeting  
612 oncoproteins for degradation or inducing cell death *per se.*, we have sought to understand  
613 the role of one particular TSG, TXNIP, in mediating chemotherapy-induced  
614 immunogenicity. Our interest in TXNIP stemmed from its reported role in regulating  
615 epithelial oxidative stress and its increased expression in fresh tumor samples after  
616 oxaliplatin treatment. By taking this observation, interrogating it *in vitro*, and investigating  
617 TXNIP's role in regulating the TME, these data have revealed a previously unreported  
618 epithelial-immune axis, namely ROS-MondoA-TXNIP-GDF15-Treg. (Figure 7. Schematic  
619 diagram).

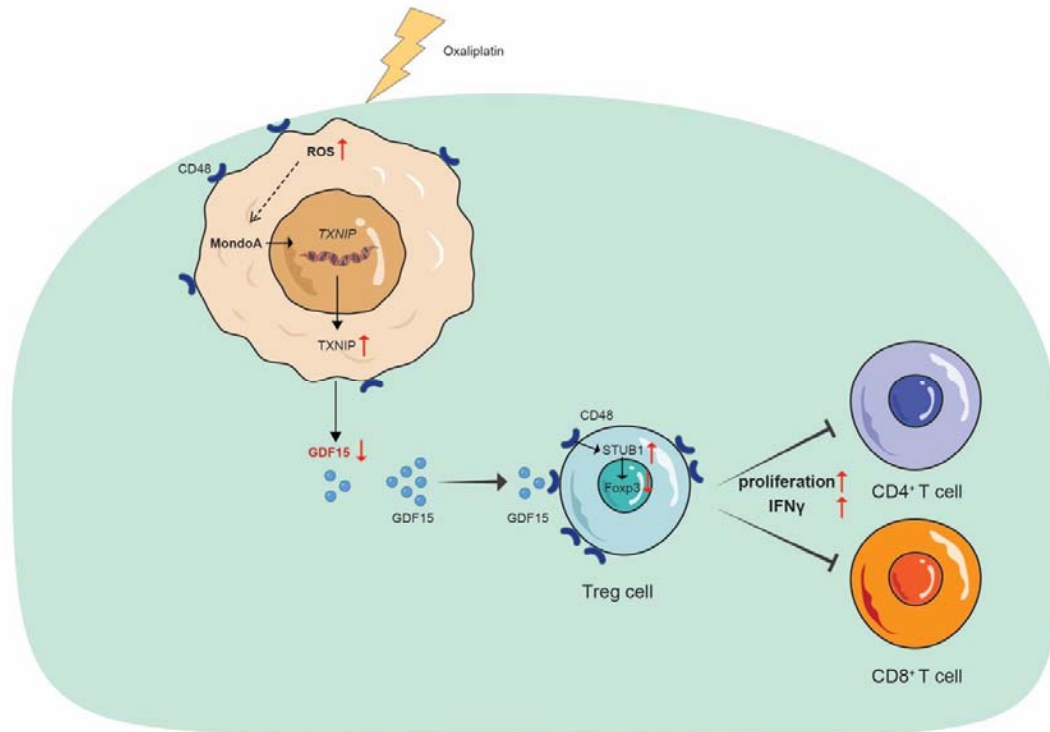

620

621 **Figure 7.** Schematic diagram of the underlying mechanism of oxaliplatin-induced immunogenicity  
622 by regulating MondoA/TXNIP/GDF15 signalling pathway in CRC.

623

624 The balance of reductive and oxidative processes is crucial for cellular life. Dysregulation  
625 can promote oxidative stress which contributes to diverse pathologies, including  
626 neurodegenerative disorders, autoimmune diseases and cancers. Intracellular ROS in  
627 tumor cells has been observed to increase upon chemo- and radiotherapy, leading to  
628 apoptosis<sup>61</sup>. Additionally, ROS levels in innate or adaptive immune cells are broadly  
629 associated with activation and anti-tumor effects<sup>24,62,63</sup>. A recent study by Gao *et al.*  
630 identified that the ROS induced by chemotherapy increased the secretion of HMGB1 to  
631 facilitate the infiltration of T cells<sup>64</sup>, highlighting the importance of ROS in mediating  
632 cancer-immune cross talk. In this study, we found oxaliplatin-induced ROS generation  
633 could activate MondoA which, in turn, induced TXNIP expression. Furthermore, combining  
634 mass spectrometry, proteomic array and genetically modified models (CRISPR-KO and

635 CRISPR-activation), before verifying *in situ*, we revealed that the ROS/MondoA/TXNIP  
636 axis negatively regulated GDF15 expression and secretion.

637 GDF15 has previously been shown to promote 'M2' macrophage differentiation, inhibit NK  
638 cell function and dendritic cell maturation<sup>65,66</sup>, however, as described the purified  
639 recombinant tools used in these studies have been shown to be contaminated with active  
640 TGF- $\beta$ 1, raising concerns (as all these effects can be ascribed to this pleotropic  
641 cytokine)<sup>56,67</sup>. In this study, to avoid this issue, we prioritised the use of cellular systems for  
642 our immunological assays. A recent study, which used mass spectrometry to confirm the  
643 material they used was not contaminated with TGF- $\beta$ 1, found that recombinant GDF15  
644 was able to induce and maintain Tregs via interaction with CD48 on naïve T cells<sup>42</sup>. Our  
645 findings support this concept, further adding tissue validation (the association of high  
646 GDF15 and FOXP3/Foxp3) and the potential of preventing this process using CD48  
647 blockade. Given these data and the well-reported negative prognostic impacts of Tregs in  
648 tumors, including in CRC, and the positive impact of chemotherapy, we put forward the  
649 following model. 1. Chemotherapy either promotes cell death or induces oxidative stress  
650 and ROS formation in the cells that survive. 2. The cells that survive do so by increasing  
651 TXNIP expression to help alleviate the impact of chemotherapy-induced ROS (or naturally  
652 carry a high level of TXNIP and are selected for). 3. This high level of TXNIP inhibits  
653 GDF15 expression which consequently inhibits the local generation of Tregs from naïve  
654 CD4 cells. 4. This decrease in Tregs allows other T cells, especially CD8s, to function and  
655 help to eradicate the remaining tumor, facilitating a durable response.

656 One of the most intriguing aspects of this work is the impact of the post-chemotherapeutic  
657 change (TXNIP<sup>low</sup>GDF15<sup>high</sup> to TXNIP<sup>high</sup>GDF15<sup>low</sup>), and the lack of change, on outcome.  
658 TXNIP is a known TSG and, as such, we show increased expression is associated with  
659 better prognosis, whilst the inverse is true for GDF15 (leading to the ongoing development  
660 of targeting drugs)<sup>57</sup>. These data suggest that the post-chemotherapeutic change,  
661 something validated in primary CRC cell lines, spheroids, PDTOs and, critically, patients



662 themselves, is associated with positive outcome. The lack of responsiveness seen in cell  
663 lines derived from secondary sites, resistant models and fresh tumors taken from patients  
664 with more advanced disease, suggests that this axis is 'broken' in these contexts. These  
665 data are supported by publicly available transcriptomic data showing that the negative  
666 correlation, indicative of response, is not seen in either primaries that do not respond to  
667 chemotherapy or in metastases. As such, these collective data suggest that there is a  
668 subgroup of patients who intrinsically carry, or develop, a lack of responsiveness, raising  
669 the possibility of using biopsies as a stratification tool. Indeed we were able to  
670 demonstrate that the pre-treatment GDF15/TXNIP ratio was able to predict tumours that  
671 were responsive to oxaliplatin from those that were not.

672 Aware of the fact that the change in GDF15/TXNIP ratio pre and post treatment would  
673 likely give a better differential between aggressive and non-aggressive groups, and aware  
674 of the fact that pre and post treatment biopsies are often difficult to control and justify  
675 clinically, we combined these ratios and tested this new metric using organoids. Using this  
676 technique and this new parameter/metric (change in GDF15/TXNIP ratio pre and post  
677 treatment) we were able to demonstrate that organoids have potential as sentinels of  
678 oxaliplatin responsiveness and disease progression,

679 With this knowledge it may well then be possible to predict oxaliplatin non-responders,  
680 using a single GDF15/TXNIP pre-treatment ratio (biopsy; transcript or protein), or a  
681 potentially more sensitive combined post-treatment / pre-treatment ratio (organoids;  
682 protein), and change treatment plans accordingly. Indeed this methodology is especially  
683 pertinent to the use of anti-GDF15 therapeutics, allowing their potential use early in  
684 disease. As such these data champion targeted, effective therapy through biological  
685 understanding and functional assessment.

## 686 **Materials and Methods**

### 687 **Public dataset analysis**

688 The cancer genome atlas (TCGA) was used to compare the differential expression of  
689 TXNIP/GDF15 between adjacent normal samples and cancer patient samples. Gene  
690 expression data from TCGA was downloaded from either the GDC data portal  
691 (<https://www.genome.gov/Funded-Programs-Projects/Cancer-Genome-Atlas>) or UCSC  
692 Xena functional genomics explorer (<https://www.xenabrowser.net>). Both colon  
693 adenocarcinoma (COAD) and rectal adenocarcinoma (READ) cohorts were included as  
694 colorectal cancer cases. Four public datasets were used in this study for prognostic  
695 analyses, including GSE29621, GSE38832, GSE6988, and GSE52735. These datasets  
696 were downloaded from the Gene Expression Omnibus (GEO,  
697 <http://www.ncbi.nlm.nih.gov/geo>). For the survival analysis, the continuous variables were  
698 dichotomized via the survminer R package, and the Kaplan-Meier curves were performed  
699 using the survival R package. To measure TXNIP and GDF15 expression in normal and  
700 tumor epithelial cells from paired samples at single-cell level, we used normalized scRNA-  
701 seq data from 10 paired samples from colorectal cancer patients deposited in GSE132465.  
702 Microarray data from responder and non-responder to FOLFOX therapy for primary and  
703 metastatic lesion was downloaded from GSE28702 and normalized using RMA and  
704 converted to the gene level using an appropriate average. ROC analysis for publicly  
705 available data was performed using rocplot.org<sup>68</sup>.

## 706 **Human samples**

707 This study was approved by Peking university Third Hospital Medical Science Research  
708 Ethics committee (Reference number IRB00006761-M2022237) and was performed in  
709 accordance with the principle of the Helsinki Declaration II. Information of the human  
710 cohorts is provided in Supplementary Table 7 and 8. Two cohorts, including 42 CRC  
711 tissues with tumor tissue and corresponding adjacent normal tissues (Supplementary  
712 Table 7) and 11 CRC tissues with pre- and matched post- oxaliplatin-based chemotherapy  
713 (Supplementary Table 8), were retrospectively collected from May 2014 to March 2021.

714 A human colorectal cancer tissue microarray (TMA) purchased from Shanghai Outdo  
715 Biotech Company Ltd (Shanghai, China). All tissue samples were collected before  
716 chemotherapy treatment. The TMA contained 97 colorectal cancer samples and paired  
717 adjacent normal tissues collected from patients between 2009 and 2018 and were  
718 accompanied by patient clinical data. Patient information of TMA is provided in  
719 Supplementary Table 9.

## 720 **Immunohistochemical (IHC) staining**

721 The tumor tissues excised during the operation were immediately placed in 10% formalin  
722 for fixation<sup>69</sup>. To begin with, FFPE slides were dewaxed and rehydrated. After antigen  
723 retrieval in 0.01 M sodium citrate buffer (PH 6.0) in a microwave for 20 min, slides were  
724 treated with peroxidase block for 5 min and protein block solution for another 5 min at RT.  
725 Then Slides were incubated with primary antibody against TXNIP (Abcam, ab188865;  
726 1:250), GDF15 (Protein-tech, 27455-1-AP; 1:500) and FOXP3 (Abcam, ab215206; 1:1000)  
727 overnight at 4°C. Post primary antibody incubation, tissues were incubated with secondary  
728 antibodies (EnVision Chem Detection Kit, DaKo Cytomation) at room temperature for 30  
729 min. Followed by incubation with horseradish enzyme-labelled streptavidin solution for  
730 10 min and then stained with DAB and haematoxylin. The stained tissues were interpreted  
731 by two pathologists blinded to the clinical parameters. Staining percentage scores were  
732 defined as: expression intensity × expression area. Expression intensity was scored from  
733 0 to 3 (10 × 20 magnification, 5 different random fields of view were selected),  
734 representing negative, weakly staining (light yellow), moderately staining (pale brown with  
735 light background), and strongly staining (dark brown without background), respectively.  
736 Expression area was scored from 0 to 4: 0 (1–5%), 2 (26–50%), 3 (51–75%) and 4  
737 (>75%). representing <5, 6–25, 26–50, 51–75, and, respectively. The degree of positive  
738 staining: 1–3 was classified as weakly positive (+); 4–6 as moderately positive (++); and  
739 7–12 as strongly positive (+++). The intraclass correlation coefficient (ICC) analysis was  
740 used for assessing the level of agreement between independent reviewers. The ICC

741 scores were 0.893, 0.912 and 0.905 for samples stained with anti-TXNIP, anti-GDF15 and  
742 anti-FOXP3 antibodies, respectively.

### 743 **scRNA-seq analysis**

744 For comparing GDF15 expression in colorectal cancer tumor samples, we used log  
745 transformed-normalized single-cell RNA sequencing data derived from 63 colorectal  
746 cancer patients<sup>70</sup> deposited at the Synapse (syn26844071) and extracted only tumor cells.

### 747 **Western blot**

748 Cells were seeded into 6-well plates ( $4 \times 10^5$  cells per well). The following day cells were  
749 replaced with fresh media for 1 hour and then treated as indicated in the Figures. Cell  
750 fractionation was performed with NE-PER™ Nuclear and Cytoplasmic Extraction Reagent  
751 (Thermo Fisher scientific, 78833), buffers were added with protease and phosphatase  
752 inhibitors. Following two washes with PBS, cells were lysed in 150-200  $\mu$ l 1.5 $\times$ sample lysis  
753 buffer (Table 5, 5 $\times$ sample lysis buffer diluted in ddH<sub>2</sub>O). Cell lysates were measured  
754 using the BCA assay (Pierce™ BCA Protein Assay Kit, 23227) and run on SDS-PAGE  
755 with 30ug protein loaded. After blocking in 5% milk or 5% bovine serum albumin (BSA) in  
756 tris-buffered saline and Tween-20 (TBST) for 2 h at room temperature. Antibodies against  
757 MondoA (Abcam, 1:1000), IL-1 $\beta$  (1:1000, Cell Signaling Technology), Caspase 1(1:1000,  
758 Cell Signaling Technology), TXNIP (1:1000, Cell Signaling Technology), Cas9 (1:1000,  
759 Santa Cruz), GDF15 (1:1000, Abcam),  $\beta$ -Actin (1:5000, Proteintech), GAPDH (1:5000,  
760 Proteintech) and Lamin A (1:1000, Cell Signaling Technology) were used for incubation  
761 overnight at 4 °C.

762 Table 5 5 $\times$  sample lysis buffer

| Reagent       | Volume |
|---------------|--------|
| 1M Tris PH6.8 | 2.5ml  |
| SDS           | 1g     |

|                        |     |
|------------------------|-----|
| Glycerol               | 5ml |
| Hit up to 60-70 degree |     |

763 **Cell lines and reagents**

764 Human colon adenocarcinoma cell lines DLD1, DiFi, and SW48 were purchased from  
765 ATCC. LIM1215 was a generous gift from Dr. Sabine Teipar (University Leuven, Belgium).  
766 HT29 and HCT15 were generous gifts from Dr. Juan Jose Garcia Gomez (University  
767 College London). DLD1, HCT15, HT29, and LIM1215 were maintained at 37°C with 5%  
768 CO<sub>2</sub> in RPMI supplemented with 10% fetal bovine serum (FBS), 1%  
769 Penicillin/streptomycin (P/S), and L-glutamine (2 mM). DiFi and SW48 were grown at  
770 37°C with 5% CO<sub>2</sub> in DMEM supplemented with 10% FBS, 1% P/S and L-glutamine (2  
771 mM). All the CRC cell lines tested negative for mycoplasma throughout the study.

772 **RNA sequencing**

773 The RNA-Seq experiments were performed by Novogene (Cambridge, UK) Company  
774 Limited<sup>71</sup>. Briefly, total RNA from CRC cells was isolated using TRIzol reagent. Messenger  
775 RNA was purified from total RNA using poly-T oligo-attached magnetic beads. After  
776 fragmentation, the first strand cDNA was synthesized using random hexamer primers  
777 followed by the second strand cDNA synthesis. The library was ready after end repair, A-  
778 tailing, adapter ligation, size selection, amplification, and purification. For the data analysis,  
779 base calls were performed using CASAVA. Reads were aligned to the genome using the  
780 split read aligner TopHat (v2.0.7) and Bowtie2, using default parameters. HTSeq was  
781 used to estimate abundance.

782 **Transfection**

783 For transient transfection, siRNA was transfected into different cell lines using  
784 Lipofectamine™ RNAiMAX Transfection Reagent (Thermo Fisher Scientific, 13778075). 3  
785 × 10<sup>5</sup> cells were seeded in 6-well plates in antibiotic-free complete medium. After 24 h, 5  
786 µl of Lipofectamine™ RNAiMAX Transfection Reagent and 25 pM siRNA (Table 6) were

787 mixed thoroughly and incubated for 20 min before added to the cells at room temperature.

788 Knockdown efficiency was assessed by western blot and PCR analysis after 48 h.

789 Table 6: Sequence of siRNA oligonucleotides

| Reagent or Resource                       | Source    | Identifier       |
|-------------------------------------------|-----------|------------------|
| ON-TARGETplus non-targeting pool siRNA    | Dharmacon | D-001810-10-05   |
| ON-TARGETplus SMARTpool siRNA Human MLXIP | Dharmacon | L-008976-00-0005 |

790

### 791 RNA isolation and quantitative real-time PCR (qRT-PCR)

792 Cells were lysed in 0.7 ml of TRIzol Lysis Reagent (Invitrogen, 15596026), vortexed and  
793 incubated for 10 min at room temperature. RNA was extracted using the RNeasy Mini Kit  
794 (Qiagen, 74104) in the presence of RNase-free DNase (Qiagen, 79254). cDNA was  
795 synthesized by reverse transcription using a SuperScript™ II Reverse Transcriptase kit  
796 (Thermo Fisher scientific, 18064022). qRT-PCR was performed with Power SYBR green  
797 PCR master mix (Applied Biosystems, 4309155). Primers are listed in Table 7. Data  
798 analysis was conducted with the QuantStudio 6 Flex Real-Time PCR System. Relative  
799 mRNA levels were calculated with normalization to the housekeeping gene *GAPDH*. (NB.  
800 *GAPDH* did not change after chemotherapy treatment as assessed in the RNAseq  
801 analysis).

802 Table 7: Primers for qRT-PCR

| Name          | Forward               | Reverse                 |
|---------------|-----------------------|-------------------------|
| <i>TXNIP</i>  | GACCTGCCCTGGTAATTGG   | GGGAGGAGCTTCTGGGGTAT    |
| <i>GAPDH</i>  | CTCCTGTTTCGACAGTCAGCC | CCCAATACGACCAAATCCGTTG  |
| <i>ARRDC4</i> | GCCAGCCAGTTCAGTATGGA  | GCATAATTTGGTGGTGCTTCAGG |
| <i>MLXIP</i>  | ACGGCTCTGTGGACGTAGA   | GGCTCTTCCAGTACTTCCCTTC  |

803

### 804 Chromatin Immunoprecipitation-Quantitative Polymerase Chain Reaction

### 805 (ChIP-PCR)

806 DLD1 cells were seeded in 75cm<sup>2</sup> flasks (~40% confluency). Overnight, cells were  
807 replaced with fresh media for 1 h and then either treated or not treated with oxaliplatin/  
808 NAC as indicated in the Figures. After 48 h, cells were cross-linked with 1% formaldehyde  
809 and quenched by glycine. Chromatin extraction was performed using the Chromatin  
810 Extraction Kit (ab117152) followed by sonication. Equal amount of chromatin was  
811 incubated overnight at 4°C with 2 µg of anti- MondoA (Proteintech, 13614-1-AP) or IgG  
812 (Cell Signaling Technology, 2729). ChIP pull-down assays were performed using the ChIP  
813 Kit Magnetic One-Step (ab 156907) according to the manufacturers' instructions.  
814 Recovered DNA was quantified by qRT-PCR using primers specific for TXNIP promoter  
815 region (forward- CACAGCGATCTCACTGATTG; reverse- GTTAGTTTCAAGCAGGAGGC)  
816 under the following conditions: 40 cycles of denaturation at 95 °C for 15 s and annealing  
817 at 56 °C for 20 s, followed by extension at 72 °C for 40 s. Specificity of the PCR product  
818 was assessed by Sanger sequencing.

### 819 **Spheroid formation Assay**

820 Spheroid culture was performed using suspensions of cells with at least 90% viability. The  
821 spheroid formation was performed with 1,000 vital cells in 100 µl per well in a low-  
822 attached 96 well plate (Corning, 3474) under standard culture conditions. DLD1 spheroids  
823 were formed after 24 h of seeding. HCT15 spheroids were formed after 72 h of seeding.  
824 CellTiter-Glo® 3D cell viability reagents (Promega) were used to analyse spheroid viability  
825 as per manufacturer's instructions. Three-dimensional cultures were treated with  
826 oxaliplatin and incubated for 48 hours.

### 827 **Patient-derived tumor organoids (PDTOs)**

828 University College Hospital London (UCLH) provided us with colonic tissues from  
829 colorectal cancer patients in accordance with the guidelines of the European Network of  
830 Research Ethics Committee (EUREC) following European, national, and local law. HTA  
831 licence: 12055, REC reference: 15/YH/0311 as overarching biobank ethical approval.

832 Informed consent forms were signed by all the participants in the study. Patient consent  
833 can be withdrawn at any time, resulting in the prompt disposal of the tissue and any  
834 derived material.

835 CRC cells were isolated as described by Sato et al<sup>72</sup>. Briefly, specimens were washed  
836 with 10ml PBS and then cut into small pieces (1-2 mm) with 10ml of digestion buffer  
837 (Suppl Table 5). Tissue and digestion buffer were transferred to a gentleMACS C Tube  
838 (run protocol 37C\_h\_TDK\_1) (Miltenyi Biotec, 130-096-334) and incubated at 37 °C for 1  
839 hour. Supernatant was aspirated after samples were filtered through 100 µm strainers  
840 (732-2759) into 50 ml tube, and centrifuged at 800xg for 2 mins. After incubating with ACK  
841 lysis buffer (A1049201) at room temperature for 5 mins, samples were washed with PBS  
842 twice. Cell pellet was resuspended in appropriate volume of Matrigel and 40 µL organoid:  
843 Matrigel droplets were plated into a 6-well plate.

844 After incubation at 37°C for 10-20 min, 2 ml of complete medium (Suppl Table 5)  
845 supplemented with the ROCK Inhibitor Y-27632 (10 µM, 72302) were added in each well.  
846 Medium was changed twice a week until ready for passage. For qPCR and western blot  
847 analyses, organoids were seeded in 6 well plate and collected after drug treatments  
848 indicated.

#### 849 **ROS measurement**

850 ROS level in cells was detected using DHE (Dihydroethidium) Assay Kit—Reactive  
851 Oxygen Species (Abcam, ab236206). Around  $1 \times 10^5$  cells were added to V-bottom plate.  
852 130 µL ROS staining buffer and then 100 µL Cell-Based Assay Buffer were used  
853 according to manufactures' guides. The fluorescence was measured using an excitation  
854 wavelength between 480-520 nm and an emission wavelength between 570-600 nm.

#### 855 **CRISPR-CAS9 genome engineering**



856 MondoA, TXNIP and GDF15 knockouts in cells and organoids were carried using the  
857 CRISPR/Cas9 system and the Edit-R CRISPR/Cas9 gene engineering protocol (Horizon).  
858 Guide RNAs for TXNIP (Edit-R CRISPR (knockout) Human TXNIP crRNA, Catalog  
859 ID:CM-010814-01-0002), GDF15 (Edit-R CRISPR (knockout) Human GDF15 crRNA,  
860 Catalog ID:CM-019875-01-0002), and MondoA (Edit-R CRISPR (knockout) Human  
861 MLXIP crRNA, Catalog ID:CM-008976-01-0002) were purchased from Horizon.

862 Cells were transfected in a 6-well plate with crRNA: tracrRNA transfection complex and  
863 Cas9 mRNA, using DharmaFECT Duo Transfection Reagent (Horizon, T-2010-02) (Suppl  
864 Table 6). After 48 h, a BD Aria Fusion cell sorter was used to sort GFP-positive single  
865 cells into 96-well plates. To measure TXNIP and GDF15 levels, each clone was expanded  
866 for 3–6 weeks. The following knockout clones were chosen: Three TXNIP knockout clones,  
867 three MondoA knockout clones, and four GDF15 knockout clones. A heterogenous  
868 knockout cell line was generated by combining knockout clones of each gene and their  
869 functional evaluation was performed. Stabilities of the knockouts were checked every five  
870 passages using PCR and western blot analysis.

871 The neon® Transfection System (Thermo Fisher Scientific, MPK5000) was used for  
872 CRISPR Editing of organoids.  $1 \times 10^5$  organoids were trypsinized and single cells were  
873 resuspended in 7.5  $\mu$ L of Resuspension Buffer R per electroporation condition, then 7.5  
874  $\mu$ L of RNP Complex Mix was added (Suppl Table 6). The mixture was electroplated as  
875 shown in Suppl Table 6. Immediately after electroporation, organoids were seeded onto a  
876 24-well prewarmed plate. Complete medium was changed every 2 days and genome  
877 editing efficiency was assessed using PCR and western blot analysis.

## 878 **Mass Spectrometry**

879 DLD-1 cells were seeded with a density around 70-80% in 6-well plates. On second day,  
880 cells were washed with PBS and replaced with 2 ml of FBS-free media (RPMI+1%  
881 penicillin/streptomycin +1% Glutamin). After 48 hrs (day 4), supernatants from cell culture

882 were collected, centrifuged (300 g/ 5 min) to get remove debris, followed by adding cold  
883 acetone at a ratio of 1:3. The mix was shaken thoroughly and stored at -20°C overnight.  
884 Protein pellets were collected after a centrifugation at 10000 g for 15 min). Keep the  
885 pellets in -80°C freezer for storage till mass spectrometry analysis. Each protein pellet  
886 was resuspended in 20 µl of 8M urea, followed by adding NuPAGE™ LDS Sample Buffer  
887 (4X) (ThermoFisher). The mixture was kept at 90°C for 5min and loaded into a 10% Bis-  
888 Tris gel, resolved for about 1cm (80 volts; 63 mA; 8 watts) before being stained with  
889 Imperial protein stain (ThermoFisher). After de-staining to remove the background, the  
890 whole section was excised and followed by an in-gel trypsin digestion overnight at 37°C.  
891 500 µg of TMTpro reagents (ThermoFisher) were added to the peptides (50 µg) along with  
892 acetonitrile and then incubated at room temperature for 1 h. After the labelling efficiency  
893 was checked out, the reaction was quenched with hydroxylamine to a final concentration  
894 of 0.3% (v/v) for 15min and all individual tags were combined as one. The sample was  
895 vacuum centrifuged to near dryness and subjected to C18 solid-phase extraction (SPE,  
896 Sep-Pak) for a clean-up.

897 MS data were collected using Orbitrap Fusion Lumos mass spectrometers. Orbitrap  
898 Fusion Lumos mass spectrometer was equipped with an Ultimate 3000 RSLC nano pump.  
899 Raw mass spectrometry data were processed into peak list files within Proteome  
900 Discoverer (ThermoScientific v2.5). Processed data were then searched using Sequest  
901 search engine embedded in Proteome Discoverer v2.5 against the reviewed Swissprot  
902 Homo Sapiens database downloaded from Uniprot (<http://www.uniprot.org/uniprot/>).

### 903 **Proteome profiler antibody array**

904 Human (R&D Systems, ARY005B) cytokine arrays were used. Cells were seeded at  
905  $4 \times 10^5$ /well in 6-well plate. Next day, the cells were replaced with fresh media with or  
906 without indicated drug. Tumor-conditioned medium (TCM) was collected after 48 h of  
907 treatment. 0.5ml of TCM was added to membrane and soluble Proteome was analysed  
908 following manufacturer's instructions.

## 909 **Enzyme-Linked Immunosorbent Assay (ELISA)**

910 ELISAs for GDF15 (DGD150), IL-1 $\beta$  (DY201-05), and IFN $\gamma$ (DY285B-05) were purchased  
911 from Biotechne and carried out as per the manufacturer's instructions. Plates were read  
912 on a CLARIOstar instrument at 450 nm, being corrected against 570 nm, and analysed  
913 using MARS software and excel. The concentration of each sample was calculated using  
914 a standard curve.

## 915 **Immunofluorescence staining**

916  $5 \times 10^3$  DLD1 cells were plated into 35 mm glass bottom dishes. After 24 h, cells were  
917 treated with 10  $\mu$ M oxaliplatin. 48 hours post treatment, cells were rinsed with PBS, fixed  
918 for 20 min with 4% PFA, rinsed with PBS, permeabilized 10 min with 0.1% Triton-X100,  
919 rinsed with TBS-T. Subsequent labelling, imaging, and image analysis steps were as  
920 previously described<sup>73</sup>.

## 921 **Generation of CRISPRa Constructs**

### 922 ***dCas9-VPR***

923 The 10XUAS-dCas9-VPR constructs have been previously described<sup>74</sup>. Instructions are  
924 available at Addgene (<https://www.addgene.org/78897/>).

### 925 ***Transfection of stable dCas9-VPR expressing cell lines with synthetic guide RNAs***

926 Cells were seeded in 6-well plates and cultured >50% confluency. Culture media was  
927 replaced with 1.6ml of fresh media before transfection. Transfection reagents were  
928 prepared in two separated tubes (A and B): Tube A (195  $\mu$ l Serum/antibiotic-free media  
929 and 5  $\mu$ l 10  $\mu$ M guide RNA mix) (Table 8) and Tube B (195  $\mu$ l Serum/antibiotic-free media  
930 and 5  $\mu$ l DharmaFECT reagent 1). Tubes A and B were mixed thoroughly and incubated  
931 at room temperature for 20 min before being added to the cells.

932 Table 8: Sequence of crRNA oligonucleotides

| Reagent or Resource                                                          | Source  | Identifier       |
|------------------------------------------------------------------------------|---------|------------------|
| CRISPRmod CRISPRa (activation)<br>Human MLXIP Synthetic crRNA<br>(SMARTpool) | Horizon | P-008976-01-0005 |
| CRISPRmod CRISPRa (activation)<br>Human TXNIP Synthetic crRNA<br>(SMARTpool) | Horizon | P-010814-01-0005 |
| CRISPRmod CRISPRa (activation)<br>Human GDF15 Synthetic crRNA<br>(SMARTpool) | Horizon | P-019875-01-0005 |
| CRISPRmod CRISPRa (activation)<br>Human MYC Synthetic crRNA<br>(SMARTpool)   | Horizon | P-003282-01-0005 |
| CRISPRmod CRISPRa synthetic<br>crRNA non-targeting controls                  | Horizon | U-009500-10-05   |

933

### 934 **Immune cell isolation**

935 Leucocyte cones were ordered from the National Health Service Blood and Transplant  
936 Service (NHSBTS) (The NHSBTS obtains informed consent from the donors and has  
937 internal ethical approval under the terms of their own HTA licence). Cells were mixed 1:1  
938 with phosphate-buffered saline (PBS) and layered on Ficoll–Paque (GE Healthcare;  
939 1714402). Cells were spun at 800 g for 30 min, with the brake off, and the PBMCs were  
940 taken from the buffy layer above the Ficoll–Paque. Naïve CD4 T cells were isolated from  
941 PBMCs using the MACS system as per manufacturer’s instructions (Miltenyi Biotech; 130-  
942 094-131. LS Columns; 130-042-401). Purity was checked using anti-CD4 and anti-  
943 CD45RA antibodies and seen to be > 95%. If purity was below 95%, the cells were  
944 disposed of.

### 945 **Flow cytometry**

946  $1-2 \times 10^5$  cells were stained with a live/dead dye (ThermoFisher; L23102) in PBS for  
947 10 min on ice in the dark, before being washed twice in FACS buffer (0.5% bovine serum  
948 albumin [Sigma; 05482] in PBS + 2 mM EDTA). Cells were then Fc blocked with Trustain  
949 (Biolegend; 422302) in FACS buffer for 10 min on ice in the dark. Cells were washed and  
950 then stained using a variety of antibodies ± secondary reagents described in Table 9,

951 using concentrations recommended by the manufacturer, on ice for 30 min in the dark.  
952 Cells were washed and either read immediately or fixed using 1% PFA in FACS buffer  
953 and read within 3 days. Cells were read using a BD Accuri C6 Plus flow cytometer, with  
954 analysis carried out using BD Accuri C6 Plus software. All cells were gated as follows: (a)  
955 Forward scatter and side scatter (SSC) to exclude cellular debris (whilst also adjusting  
956 threshold), (b) live/dead (only live cells carried forward) and (c) SSC-A vs. SSC-H—only  
957 singlets carried forward. All MFIs were corrected against an appropriate isotype control.  
958 Intracellular flow cytometry was carried out using the intracellular fixation and  
959 permeabilization kit (ebioscience; 88-8824-00) according to manufacturer's instructions.

960 Table 9: antibodies and reagents

| Antibodies                                          | Source       | Identifier  |
|-----------------------------------------------------|--------------|-------------|
| LIVE/DEAD™ Fixable Red Dead Cell Stain Kit          | ThermoFisher | Cat# L23102 |
| Human TruStain FcX™ (Fc Receptor Blocking Solution) | Biolegend    | Cat# 422302 |
| PE Mouse IgG1, κ Isotype Ctrl Antibody              | Biolegend    | Cat# 400112 |
| FITC Mouse IgG1, κ Isotype Ctrl (FC) Antibody       | Biolegend    | Cat# 400110 |
| PerCP Mouse IgG1, κ Isotype Ctrl Antibody           | Biolegend    | Cat# 400148 |
| FITC anti-human CD48 Antibody                       | Biolegend    | Cat# 336706 |
| PerCP anti-human CD4 Antibody                       | Biolegend    | Cat# 317432 |
| FITC anti-human CD3 Antibody                        | Biolegend    | Cat# 317306 |
| PE anti-human CD8 Antibody                          | Biolegend    | Cat# 344706 |
| PE anti-human FOXP3 Antibody                        | Biolegend    | Cat# 320108 |
| PE anti-human CD45RA Antibody                       | Biolegend    | Cat# 304108 |
| FOXP3 Fix/Perm Buffer Set                           | Biolegend    | Cat# 421403 |

961 **Proliferation assays**

962 96 well tissue culture stimulation plates were prepared the night before by adding 100  
963 µl/well 1 µg/ml anti-CD3 (OKT3) in PBS. PBMCs were stained using an eFluor™ 670 dye  
964 (65-0840-85; ebioscience) according to manufacturer's instructions, and plated at  $2 \times 10^5$   
965 cells in 100 µl. 100 µl of supernatant or other factors were added and cells were cultured  
966 for 4 days.

967 **Functional Treg assay**

968 Anti-CD3 (OKT3) was plated at 1 µg/ml in PBS and incubated overnight at 4 °C.  
969 Supernatant was removed and  $2 \times 10^5$  / cell isolated naïve CD4 cells were added in the

970 presence of 1 µg/ml anti-CD28 in the presence of NTC or GDF15 (a) supernatant +/-  
971 isotype control (10 µg/ml) or anti-CD48 (10 µg/ml). Cells were cultured at 37 °C for 4 days.  
972 On day 3, anti-CD3 was plated at 1 µg/ml in PBS and incubated overnight at 4 °C.  
973 Allogeneic PBMCs were isolated, stained with eFluor™ 670 proliferation dye and plated at  
974  $1 \times 10^5$  cells/ well.  $1 \times 10^5$  Tregs were added at a 1:1 ratio and the co-culture was run for 4  
975 days. Cells were then harvested and stained with anti-CD3, anti-CD8 and anti-CD4  
976 antibodies. The proliferation dye MFI in the responder population was normalized against  
977 matched cells stimulated in media alone.

### 978 **Establishment of oxaliplatin-resistant (OXAR) cell lines**

979 Oxaliplatin-resistant cells (OXAR) cells were established by treatment with constant  
980 oxaliplatin concentration *in vitro*. Different oxaliplatin concentrations (50 µM for DLD1 and  
981 25 µM for HCT15) were added to RPMI complete media. DLD1 and HCT15 cells were  
982 sub-cultured every 2 weeks. Finally, cell lines that capable of growing exponentially in  
983 RPMI with high concentrations of oxaliplatin were identified as drug resistant cell lines.  
984 The final tolerated drug concentrations are shown in Table 10. Experiments on resistant  
985 cell lines were performed after culturing in the medium without oxaliplatin for at least 2-3  
986 weeks.

987 Table 10. The tolerated concentration of each resistant subline from oxaliplatin.

| <b>Drug resistant cell lines</b> | <b>Drug concentration (IC50, ratio)</b> |
|----------------------------------|-----------------------------------------|
| DLD1-OXAR                        | 109.20 µM (=6.2×IC50)                   |
| HCT15-OXAR                       | 36.45 µM (=5.4×IC50)                    |

988

### 989 **Cell viability Assay**

990 The Deep Blue Cell Viability™ Kit (BioLegend, 424701) was used to analyse cell  
991 chemotherapy-induced cytotoxicity. After cells were seeded into 96-well plates (5000  
992 cells/well), oxaliplatin (Ebewe Pharma, Austria) was added to the wells in several doses

993 for 48-72 hours. The plate was incubated at 37 °C for 3 hours following the addition of  
994 1:10 volume ratio of Deep Blue Cell Viability™ reagent to each well. A CLARIOstar Plate  
995 Reader (Excitation: 530-570 nm, Emission = 590-620 nm) was used to detect the  
996 reduction of resazurin into resorufin and the OD value was used to calculate cell viability.

## 997 **Statistical analysis**

998 All *in vitro* experiments were performed in three independent replicates for three times. All  
999 quantitative data are presented as mean ± standard error of the mean (SEM) and were  
1000 analysed using GraphPad Prism 9.0. The means of the two datasets were compared  
1001 using paired t-tests. One-way ANOVA was used to evaluate multiple independent groups.  
1002 The chi-squared test was applied to compare categorical variables. Kaplan–Meier  
1003 analyses were performed via the survival package. P-value < 0.05 was considered as  
1004 statistically significant.

## 1005 **Acknowledgements and Funding**

1006 This work was supported by China Scholarship Council Awards (No.201806010012 to JD,  
1007 No.202006940028 to TP); CRUK Early Detection and Diagnosis Committee (Project grant,  
1008 C1519/A27375). RB is supported by MR/R000026/1 and UCLH/UCL BRC who received a  
1009 proportion of funding from the Department of Health's NIHR Biomedical Research Centres  
1010 funding scheme. LD is supported by EU IMI2 IMMUCAN (Grant agreement number  
1011 821558). GA and JV are supported by CRUK Early Detection and Diagnosis Committee  
1012 Project grant (C7675/A29313). ZA was supported by the KCL Breast Cancer Now  
1013 Research Unit (grant KCL-Q2-Y5). KN was supported by Cancer Research UK Clinical  
1014 Training Fellowship (Award number 176885). CG is supported by CRUK City of London  
1015 Centre (CTRQQR-2021\100004). RE is jointly supported by a Global Pharmaceutical  
1016 Development Science Fellowship and Training grant to KCL and CRUK City of London  
1017 Centre RadNET grant.

1018 **Authors' contributions**

1019 JD and TP have contributed equally to this work. TN and RB are the corresponding  
1020 authors to this work. Conceptualization, resources, supervision and project administration  
1021 were carried out by TN, JD and RB; Methodology, software, formal analysis, investigation,  
1022 data curation and visualization were performed by JD, TP, RB. Writing – original draft by  
1023 JD, RB. Writing – review & editing were done by TN, JD, RB and TP. Single cell RNA  
1024 sequencing analyses - YH, ZH and ST. Patient derived organoids establishment: M R-J,  
1025 PV, CJT, JD, KN, CADCG, CM. Mass spectrometry analyses: XY, JD, TP. Patient sample  
1026 collection and IHC staining: XZ, GL. TCGA data analyses: ZL, LL, YC. CHIP-PCR analysis:  
1027 GA, JD. Q-PCR analysis: JD, TP, LD. CRISPR-activation cell model establishment: JM,  
1028 JD. MY, JCP, JMV and GW reviewed and edited the manuscript. All authors reviewed and  
1029 approved the final manuscript.

1030 **Ethics approval and consent to participate**

1031 The study was performed in accordance with the principles of the Declaration of Helsinki.

1032 **Consent for publication**

1033 We have obtained consent to publish from the participant to report individual patient data.

1034 **Availability of data and material**

1035 The RNAseq data will be available to the public through the GEO portal (currently in  
1036 process). Other datasets generated during and/or analysed during the current study are  
1037 available from the corresponding author on reasonable request.

1038 **Competing interests**

1039 The authors have no conflict of interest to disclose about this study.



1040 **References**

- 1041 1. Siegel, R. L. *et al.* Colorectal cancer statistics, 2017. *CA. Cancer J. Clin.* **67**, 177–  
1042 193 (2017).
- 1043 2. Sung, H. *et al.* Global Cancer Statistics 2020: GLOBOCAN Estimates of Incidence  
1044 and Mortality Worldwide for 36 Cancers in 185 Countries. *CA. Cancer J. Clin.* **71**,  
1045 209–249 (2021).
- 1046 3. Schilsky, R. L. A New IDEA in Adjuvant Chemotherapy for Colon Cancer. *N. Engl. J.*  
1047 *Med.* **378**, 1242–1244 (2018).
- 1048 4. Hess, G. P., Wang, P. F., Quach, D., Barber, B. & Zhao, Z. Systemic Therapy for  
1049 Metastatic Colorectal Cancer: Patterns of Chemotherapy and Biologic Therapy Use  
1050 in US Medical Oncology Practice. *J. Oncol. Pract.* **6**, 301–7 (2010).
- 1051 5. Zitvogel, L., Apetoh, L., Ghiringhelli, F. & Kroemer, G. Immunological aspects of  
1052 cancer chemotherapy. *Nature Reviews Immunology* vol. 8 59–73 at  
1053 <https://doi.org/10.1038/nri2216> (2008).
- 1054 6. Opzoomer, J. W., Sosnowska, D., Anstee, J. E., Spicer, J. F. & Arnold, J. N.  
1055 Cytotoxic chemotherapy as an immune stimulus: A molecular perspective on  
1056 turning up the immunological heat on cancer. *Front. Immunol.* **10**, 1654 (2019).
- 1057 7. Kroemer, G., Galluzzi, L., Kepp, O. & Zitvogel, L. Immunogenic Cell Death in  
1058 Cancer Therapy. <http://dx.doi.org/10.1146/annurev-immunol-032712-100008> **31**,  
1059 51–72 (2013).
- 1060 8. Gebremeskel, S. *et al.* Natural killer T-cell immunotherapy in combination with  
1061 chemotherapy-induced immunogenic cell death targets metastatic breast cancer.  
1062 *Cancer Immunol. Res.* **5**, 1086–1097 (2017).
- 1063 9. Galluzzi, L. *et al.* Molecular mechanisms of cell death: recommendations of the  
1064 Nomenclature Committee on Cell Death 2018. *Cell Death Differ.* **2018 253** **25**, 486–  
1065 541 (2018).
- 1066 10. Krysko, D. V. *et al.* Immunogenic cell death and DAMPs in cancer therapy. *Nat.*  
1067 *Rev. Cancer* **2012 1212** **12**, 860–875 (2012).
- 1068 11. Parra, E. R. *et al.* Effect of neoadjuvant chemotherapy on the immune  
1069 microenvironment in non-small cell lung carcinomas as determined by multiplex  
1070 immunofluorescence and image analysis approaches. *J. Immunother. cancer* **6**,  
1071 (2018).
- 1072 12. Hodge, J. W. *et al.* Chemotherapy-induced immunogenic modulation of tumor cells  
1073 enhances killing by cytotoxic T lymphocytes and is distinct from immunogenic cell  
1074 death. *Int. J. Cancer* **133**, 624 (2013).
- 1075 13. Zhu, J. *et al.* Resistance to cancer immunotherapy mediated by apoptosis of tumor-  
1076 infiltrating lymphocytes. *Nat. Commun.* **2017 81** **8**, 1–15 (2017).
- 1077 14. Gadiyar, V. *et al.* Cell Death in the Tumor Microenvironment: Implications for  
1078 Cancer Immunotherapy. *Cells* **9**, (2020).
- 1079 15. Nishiyama, A. *et al.* Identification of Thioredoxin-binding Protein-2/Vitamin D3 Up-  
1080 regulated Protein 1 as a Negative Regulator of Thioredoxin Function and  
1081 Expression \*. *J. Biol. Chem.* **274**, 21645–21650 (1999).
- 1082 16. Junn, E. *et al.* Vitamin D3 up-regulated protein 1 mediates oxidative stress via  
1083 suppressing the thioredoxin function. *J. Immunol.* **164**, 6287–6295 (2000).

- 1084 17. Sheth, S. S. *et al.* Hepatocellular carcinoma in Txnip-deficient mice. *Oncogene*  
1085 2006 2525 **25**, 3528–3536 (2006).
- 1086 18. Morrison, J. A. *et al.* Thioredoxin interacting protein (TXNIP) is a novel tumor  
1087 suppressor in thyroid cancer. *Mol. Cancer* **13**, 1–13 (2014).
- 1088 19. Jiao, D. *et al.* UHRF1 promotes renal cell carcinoma progression through  
1089 epigenetic regulation of TXNIP. *Oncogene* 2019 3828 **38**, 5686–5699 (2019).
- 1090 20. Nishizawa, K. *et al.* Thioredoxin-interacting protein suppresses bladder  
1091 carcinogenesis. *Carcinogenesis* **32**, 1459–1466 (2011).
- 1092 21. Klein Geltink, R. I. *et al.* Mitochondrial Priming by CD28. *Cell* **171**, 385–397.e11  
1093 (2017).
- 1094 22. Lu, Y. *et al.* MondoA–Thioredoxin-Interacting Protein Axis Maintains Regulatory T-  
1095 Cell Identity and Function in Colorectal Cancer Microenvironment.  
1096 *Gastroenterology* **161**, 575–591.e16 (2021).
- 1097 23. Muri, J., Thut, H. & Kopf, M. The thioredoxin-1 inhibitor Txnip restrains effector T-  
1098 cell and germinal center B-cell expansion. *Eur. J. Immunol.* **51**, 115–124 (2021).
- 1099 24. Yang, Y. *et al.* Thioredoxin activity confers resistance against oxidative stress in  
1100 tumor-infiltrating NK cells. *J. Clin. Invest.* **130**, 5508–5522 (2020).
- 1101 25. Wu, N. *et al.* AMPK-Dependent Degradation of TXNIP upon Energy Stress Leads  
1102 to Enhanced Glucose Uptake via GLUT1. *Mol. Cell* **49**, 1167–1175 (2013).
- 1103 26. Waldhart, A. N. *et al.* Phosphorylation of TXNIP by AKT Mediates Acute Influx of  
1104 Glucose in Response to Insulin. *Cell Rep.* **19**, 2005–2013 (2017).
- 1105 27. Kuljaca, S. *et al.* The cyclin-dependent kinase inhibitor, p21 WAF1 , promotes  
1106 angiogenesis by repressing gene transcription of thioredoxin-binding protein 2 in  
1107 cancer cells. *Carcinogenesis* **30**, 1865–1871 (2009).
- 1108 28. Jeon, J.-H. *et al.* Tumor Suppressor VDUP1 Increases p27kip1 Stability by  
1109 Inhibiting JAB1. *Cancer Res.* **65**, 4485–4489 (2005).
- 1110 29. Yi, S. *et al.* Dual Role of EZH2 in Cutaneous Anaplastic Large Cell Lymphoma:  
1111 Promoting Tumor Cell Survival and Regulating Tumor Microenvironment. *J. Invest.*  
1112 *Dermatol.* **138**, 1126–1136 (2018).
- 1113 30. Di, Y. *et al.* Downregulation of miR-135b-5p Suppresses Progression of  
1114 Esophageal Cancer and Contributes to the Effect of Cisplatin. *Front. Oncol.* **11**,  
1115 2363 (2021).
- 1116 31. Woolston, C. M. *et al.* Thioredoxin interacting protein and its association with  
1117 clinical outcome in gastro-oesophageal adenocarcinoma. *Redox Biol.* **1**, 285–291  
1118 (2013).
- 1119 32. Bootcov, M. R. *et al.* MIC-1, a novel macrophage inhibitory cytokine, is a divergent  
1120 member of the TGF- $\beta$  superfamily. *Natl. Acad. Sci.* **94**, 11514–11519 (1997).
- 1121 33. Boyle, G. M. *et al.* Macrophage Inhibitory Cytokine-1 Is Overexpressed in Malignant  
1122 Melanoma and Is Associated with Tumorigenicity. *J. Invest. Dermatol.* **129**, 383–  
1123 391 (2009).
- 1124 34. Bauskin, A. R. *et al.* Role of Macrophage Inhibitory Cytokine-1 in Tumorigenesis  
1125 and Diagnosis of Cancer. *Cancer Res.* **66**, 4983–4986 (2006).

- 1126 35. Baek, S. J., Kim, K. S., Nixon, J. B., Wilson, L. C. & Eling, T. E. Cyclooxygenase  
1127 Inhibitors Regulate the Expression of a TGF- $\beta$  Superfamily Member That Has  
1128 Proapoptotic and Antitumorigenic Activities. *Mol. Pharmacol.* **59**, 901–908 (2001).
- 1129 36. Brown, D. A. *et al.* Measurement of Serum Levels of Macrophage Inhibitory  
1130 Cytokine 1 Combined with Prostate-Specific Antigen Improves Prostate Cancer  
1131 Diagnosis. *Clin. Cancer Res.* **12**, 89–96 (2006).
- 1132 37. Welsh, J. B. *et al.* Large-scale delineation of secreted protein biomarkers  
1133 overexpressed in cancer tissue and serum. *Proc. Natl. Acad. Sci. U. S. A.* **100**,  
1134 3410–3415 (2003).
- 1135 38. Tsai, V. W. W., Husaini, Y., Sainsbury, A., Brown, D. A. & Breit, S. N. The MIC-  
1136 1/GDF15-GFRAL Pathway in Energy Homeostasis: Implications for Obesity,  
1137 Cachexia, and Other Associated Diseases. *Cell Metab.* **28**, 353–368 (2018).
- 1138 39. Kim, J. M. *et al.* NAG-1/GDF15 transgenic mouse has less white adipose tissue  
1139 and a reduced inflammatory response. *Mediators Inflamm.* **2013**, (2013).
- 1140 40. Roth, P. *et al.* GDF-15 contributes to proliferation and immune escape of malignant  
1141 gliomas. *Clin. Cancer Res.* **16**, 3851–3859 (2010).
- 1142 41. Gao, Y. *et al.* Growth differentiation factor-15 promotes immune escape of ovarian  
1143 cancer via targeting CD44 in dendritic cells. *Exp. Cell Res.* **402**, 112522 (2021).
- 1144 42. Wang, Z. *et al.* GDF15 induces immunosuppression via CD48 on regulatory T cells  
1145 in hepatocellular carcinoma. *J. Immunother. cancer* **9**, (2021).
- 1146 43. Masutani, H. Thioredoxin-Interacting Protein in Cancer and Diabetes. *Antioxid.*  
1147 *Redox Signal.* **36**, (2022).
- 1148 44. Takahashi, Y. *et al.* Decreased expression of thioredoxin interacting protein mRNA  
1149 in inflamed colonic mucosa in patients with ulcerative colitis. *Oncol. Rep.* **18**, (2007).
- 1150 45. Schmidt, H. B. *et al.* Oxaliplatin disrupts nucleolar function through biophysical  
1151 disintegration. *Cell Rep.* **41**, 111629 (2022).
- 1152 46. Jensen, C. & Teng, Y. Is It Time to Start Transitioning From 2D to 3D Cell Culture?  
1153 *Front. Mol. Biosci.* **7**, 33 (2020).
- 1154 47. Lu, J. & Holmgren, A. The thioredoxin antioxidant system. *Free Radic. Biol. Med.*  
1155 **66**, 75–87 (2014).
- 1156 48. Rottenberg, S., Disler, C. & Perego, P. The rediscovery of platinum-based cancer  
1157 therapy. *Nat. Rev. Cancer* **2020 211 21**, 37–50 (2020).
- 1158 49. Ogata, F. T. *et al.* Nitrosative/oxidative stress conditions regulate thioredoxin-  
1159 interacting protein (TXNIP) expression and thioredoxin-1 (TRX-1) nuclear  
1160 localization. *PLoS One* **8**, (2013).
- 1161 50. Santoro, V. *et al.* Role of Reactive Oxygen Species in the Abrogation of Oxaliplatin  
1162 Activity by Cetuximab in Colorectal Cancer. *JNCI J. Natl. Cancer Inst.* **108**, 394  
1163 (2016).
- 1164 51. Stoltzman, C. A. *et al.* Glucose sensing by MondoA:Mix complexes: A role for  
1165 hexokinases and direct regulation of thioredoxin-interacting protein expression.  
1166 *Proc. Natl. Acad. Sci.* **105**, 6912–6917 (2008).
- 1167 52. Peterson, C. W., Stoltzman, C. A., Sighinolfi, M. P., Han, K.-S. & Ayer, D. E.  
1168 Glucose Controls Nuclear Accumulation, Promoter Binding, and Transcriptional  
1169 Activity of the MondoA-Mix Heterodimer. *Mol. Cell. Biol.* **30**, (2010).

- 1170 53. Richards, P. *et al.* MondoA Is an Essential Glucose-Responsive Transcription  
1171 Factor in Human Pancreatic  $\beta$ -Cells. *Diabetes* **67**, 461–472 (2018).
- 1172 54. Guo, X. *et al.* A pan-cancer analysis of thioredoxin-interacting protein as an  
1173 immunological and prognostic biomarker. *Cancer Cell Int.* **22**, 1–16 (2022).
- 1174 55. Zhou, R., Tardivel, A., Thorens, B., Choi, I. & Tschopp, J. Thioredoxin-interacting  
1175 protein links oxidative stress to inflammasome activation. *Nat. Immunol.* **11**, 136–  
1176 140 (2010).
- 1177 56. Olsen, O. E., Skjærvik, A., Størdal, B. F., Sundan, A. & Holien, T. TGF- $\beta$   
1178 contamination of purified recombinant GDF15. *PLoS One* **12**, e0187349 (2017).
- 1179 57. Wallin, U. *et al.* Growth differentiation factor 15: a prognostic marker for recurrence  
1180 in colorectal cancer. *Br. J. Cancer* *2011 10410* **104**, 1619–1627 (2011).
- 1181 58. Jobin, G., Rodriguez-Suarez, R. & Betito, K. Association Between Natural Killer Cell  
1182 Activity and Colorectal Cancer in High-Risk Subjects Undergoing Colonoscopy.  
1183 *Gastroenterology* **153**, 980–987 (2017).
- 1184 59. Betts, G. *et al.* Suppression of tumour-specific CD4+ T cells by regulatory T cells is  
1185 associated with progression of human colorectal cancer. *Gut* **61**, 1163–1171 (2012).
- 1186 60. Siegel, R. L., Miller, K. D. & Jemal, A. Cancer statistics, 2020. *CA. Cancer J. Clin.*  
1187 **70**, 7–30 (2020).
- 1188 61. Perillo, B. *et al.* ROS in cancer therapy: the bright side of the moon. *Exp. Mol. Med.*  
1189 *2020 522* **52**, 192–203 (2020).
- 1190 62. Kalafati, L. *et al.* Innate Immune Training of Granulopoiesis Promotes Anti-tumor  
1191 Activity. *Cell* **183**, 771-785.e12 (2020).
- 1192 63. Scharping, N. E. *et al.* Mitochondrial stress induced by continuous stimulation under  
1193 hypoxia rapidly drives T cell exhaustion. *Nat. Immunol.* **22**, 205–215 (2021).
- 1194 64. Gao, Q. *et al.* Cancer-cell-secreted CXCL11 promoted CD8+ T cells infiltration  
1195 through docetaxel-induced-release of HMGB1 in NSCLC. *J. Immunother. Cancer* **7**,  
1196 42 (2019).
- 1197 65. Kleinertz, H. *et al.* Circulating growth/differentiation factor 15 is associated with  
1198 human CD56bright natural killer cell dysfunction and nosocomial infection in severe  
1199 systemic inflammation. *EBioMedicine* **43**, 380–391 (2019).
- 1200 66. Zhou, Z. *et al.* Growth differentiation factor-15 suppresses maturation and function  
1201 of dendritic cells and inhibits tumor-specific immune response. *PLoS One* **8**, (2013).
- 1202 67. Rochette, L., Zeller, M., Cottin, Y. & Vergely, C. Insights Into Mechanisms of  
1203 GDF15 and Receptor GFRAL: Therapeutic Targets. *Trends Endocrinol. Metab.* **31**,  
1204 939–951 (2020).
- 1205 68. Fekete, J. T. & Györffy, B. New Transcriptomic Biomarkers of 5-Fluorouracil  
1206 Resistance. *Int. J. Mol. Sci.* **24**, 1–12 (2023).
- 1207 69. Zhou, X. *et al.* Differential and Prognostic Significance of HOXB7 in Gliomas. *Front.*  
1208 *cell Dev. Biol.* **9**, (2021).
- 1209 70. Joanito, I. *et al.* Single-cell and bulk transcriptome sequencing identifies two  
1210 epithelial tumor cell states and refines the consensus molecular classification of  
1211 colorectal cancer. *Nat. Genet.* *2022 18*, 1–13 (2022).

- 1212 71. Pan, T. *et al.* Centromere protein U (CENPU) enhances angiogenesis in triple-  
1213 negative breast cancer by inhibiting ubiquitin-proteasomal degradation of COX-2.  
1214 *Cancer Lett.* **482**, 102–111 (2020).
- 1215 72. Sato, T. *et al.* Long-term expansion of epithelial organoids from human colon,  
1216 adenoma, adenocarcinoma, and Barrett's epithelium. *Gastroenterology* **141**, 1762–  
1217 1772 (2011).
- 1218 73. Vicencio, J. M. *et al.* Osimertinib and anti-HER3 combination therapy engages  
1219 immune dependent tumor toxicity via STING activation in trans. *Cell Death Dis.* **13**,  
1220 (2022).
- 1221 74. Lin, S., Ewen-Campen, B., Ni, X., Housden, B. E. & Perrimon, N. In Vivo  
1222 Transcriptional Activation Using CRISPR/Cas9 in *Drosophila*. *Genetics* **201**, 433–  
1223 442 (2015).
